# Supplementary material for: Ni(ii)-Dithiocarbamate and -diphosphine coordination complexes as pre-catalysts for electrochemical OER activity
Source: Royal Society of Chemistry journal article supplement (doi:10.1039/d4dt02447h), 2024-12-04
Supplement: d4dt02447h1.pdf [file d4dt02447h1.pdf]

### Electronic Supporting Information

#### **Ni(II)-dithiocarbamate and -diphosphine coordination complexes as pre-catalysts for electrochemical OER activity**

Sarvesh Kumar Pal<sup>a</sup>, Toufik Ansari<sup>b</sup>, Chote Lal Yadav<sup>a</sup>, Nanhai Singh<sup>a</sup>, Prem Lama<sup>c\*</sup>, Arindam Indra<sup>b\*</sup>, Kamlesh Kumar<sup>a\*</sup>

<sup>a</sup> *Department of Chemistry, Institute of Science, Banaras Hindu University, Varanasi-221005, India*

<sup>b</sup> *Department of Chemistry, Indian Institute of Technology, Banaras Hindu University, Varanasi-221005, India*

<sup>c</sup> *CSIR-Indian Institute of Petroleum, Nanocatalysis Area, LSP Division, Mohkampur, Dehradun-248005, India*

*Email Address of Corresponding Authors: [kamlesh.kumar@bhu.ac.in](mailto:kamlesh.kumar@bhu.ac.in) (Kamlesh Kumar)*

*[arindam.chy@iitbhu.ac.in](mailto:arindam.chy@iitbhu.ac.in) (Arindam Indra), [prem.lama@iip.res.in](mailto:prem.lama@iip.res.in) (Prem Lama)*

| <b>S No.</b>        | <b>Contents</b>                                                                                                                                        | <b>Page</b>  |
|---------------------|--------------------------------------------------------------------------------------------------------------------------------------------------------|--------------|
| <b>Fig. S1a-S1d</b> | FT-IR spectra of complexes <b>1-4</b> .                                                                                                                | <b>2-3</b>   |
| <b>Fig. S2a-S2p</b> | <sup>1</sup> H, <sup>13</sup> C{ <sup>1</sup> H}, <sup>31</sup> P{ <sup>1</sup> H}, <sup>19</sup> F{ <sup>1</sup> H} spectra of complexes <b>1-4</b> . | <b>4-11</b>  |
| <b>Fig. S3</b>      | UV-Vis absorption spectra of dithiocarbamate ( <b>KL1-KL2</b> ) and diphosphine ( <b>dppe, dppf</b> ) ligands .                                        | <b>12</b>    |
| <b>Fig. S4</b>      | CV profiles of electrochemical activation of complex <b>1-4</b> .                                                                                      | <b>12</b>    |
| <b>Fig. S5</b>      | CV profiles of anodically activated complexes <b>1-4@CC</b> .                                                                                          | <b>13</b>    |
| <b>Fig. S6</b>      | EIS curves.                                                                                                                                            | <b>13</b>    |
| <b>Fig. S7</b>      | Determination of C <sub>dl</sub> .                                                                                                                     | <b>14</b>    |
| <b>Fig. S8</b>      | Redox peak integration for the determination of the number of active sites.                                                                            | <b>15</b>    |
| <b>Fig. S9</b>      | FT-IR, Powder XRD patterns, and Raman spectra of active catalyst derived from complex <b>4</b> after OER catalysis.                                    | <b>18</b>    |
| <b>Fig. S10</b>     | PXRD patterns of active catalysts derived from synthesized complexes <b>1-4@CC</b> after 100 CV cycles.                                                | <b>19</b>    |
| <b>Fig. S11</b>     | XPS spectrum of complex <b>4</b> before catalysis.                                                                                                     | <b>20</b>    |
| <b>Fig. S12</b>     | XPS spectrum of active catalyst derived from complex <b>4</b> after catalysis.                                                                         | <b>21</b>    |
| <b>Fig. S13</b>     | CVs of complexes <b>1-4</b> in acetonitrile solution.                                                                                                  | <b>22</b>    |
| <b>Fig. S14</b>     | UV-Vis. spectra of dppf, electrolyte solution, KL2 ligand, complex <b>4</b> before and after CA.                                                       | <b>22</b>    |
| <b>Equation S1</b>  | Determination of the number of active sites.                                                                                                           | <b>15-16</b> |
| <b>Equation S2</b>  | Determination of turn over frequency (TOF).                                                                                                            | <b>16-17</b> |
| <b>Equation S3</b>  | Calculation of exchange current density.                                                                                                               | <b>17</b>    |
| <b>Table S1.</b>    | A literature survey table of related Ni(II)-based catalysts.                                                                                           | <b>23</b>    |

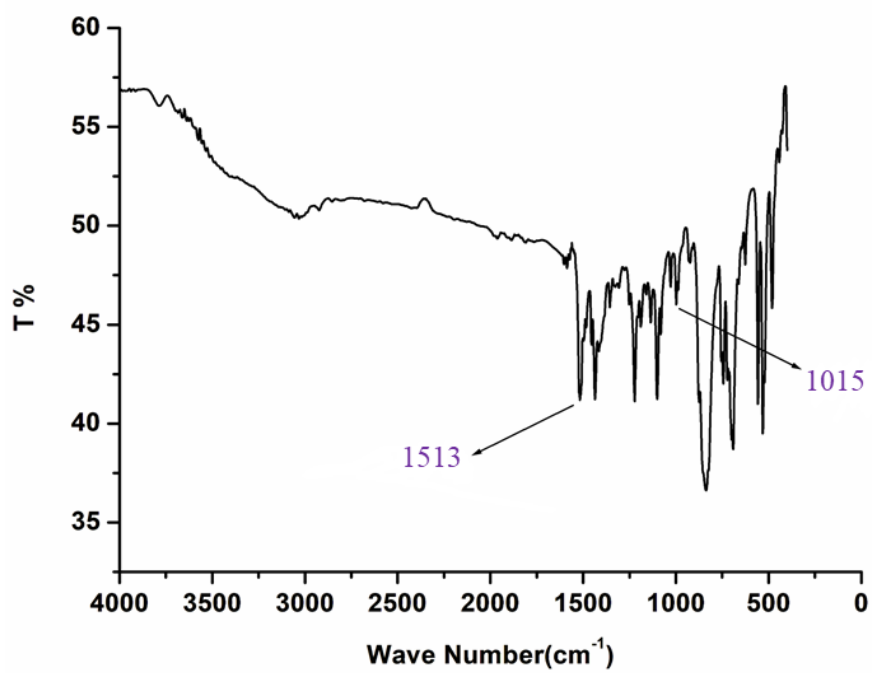

**Fig. S1a:** FT-IR spectrum of complex 1.

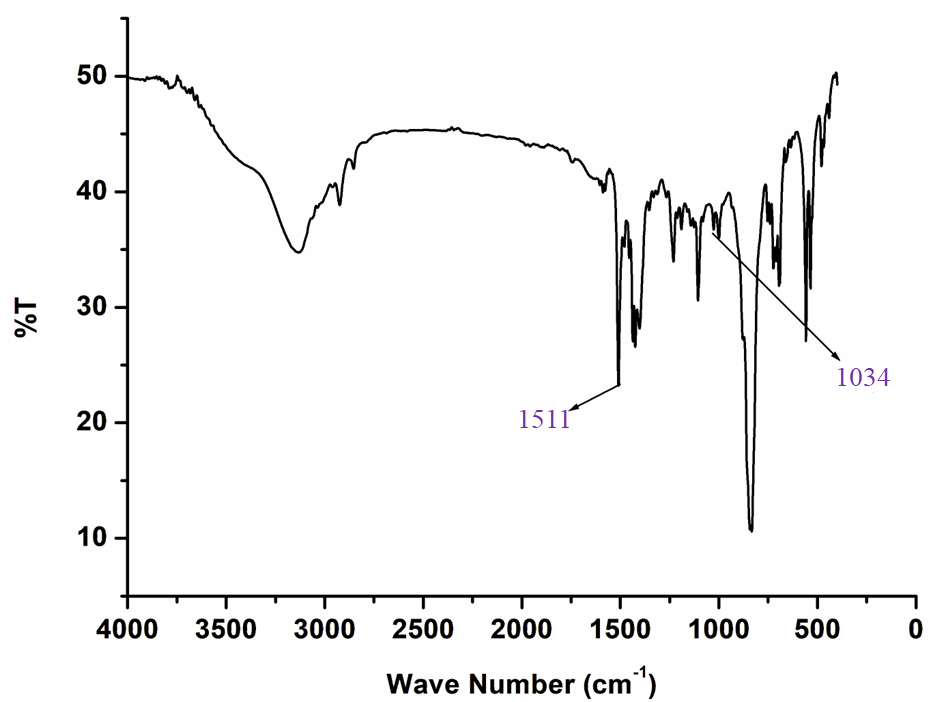

**Fig. S1b:** FT-IR spectrum of complex 2.

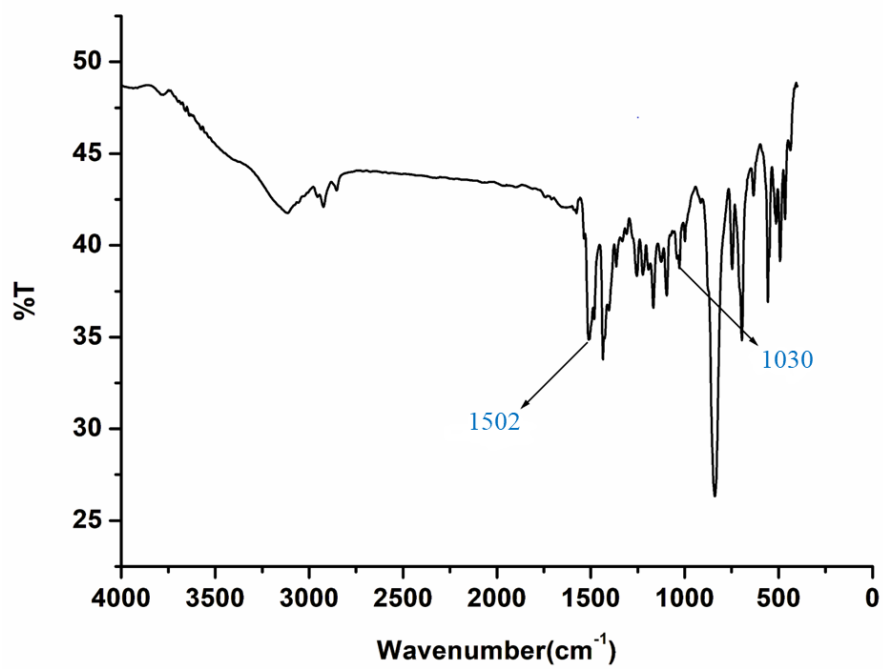

**Fig. S1c:** FT-IR spectrum of complex 3.

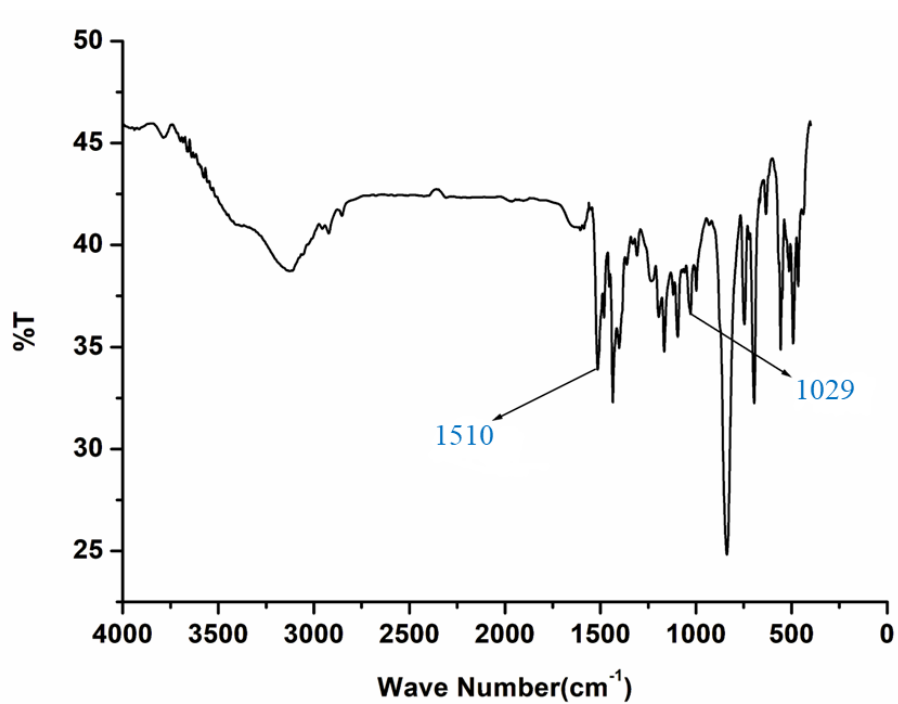

**Fig. S1d:** FT-IR spectrum of complex 4.

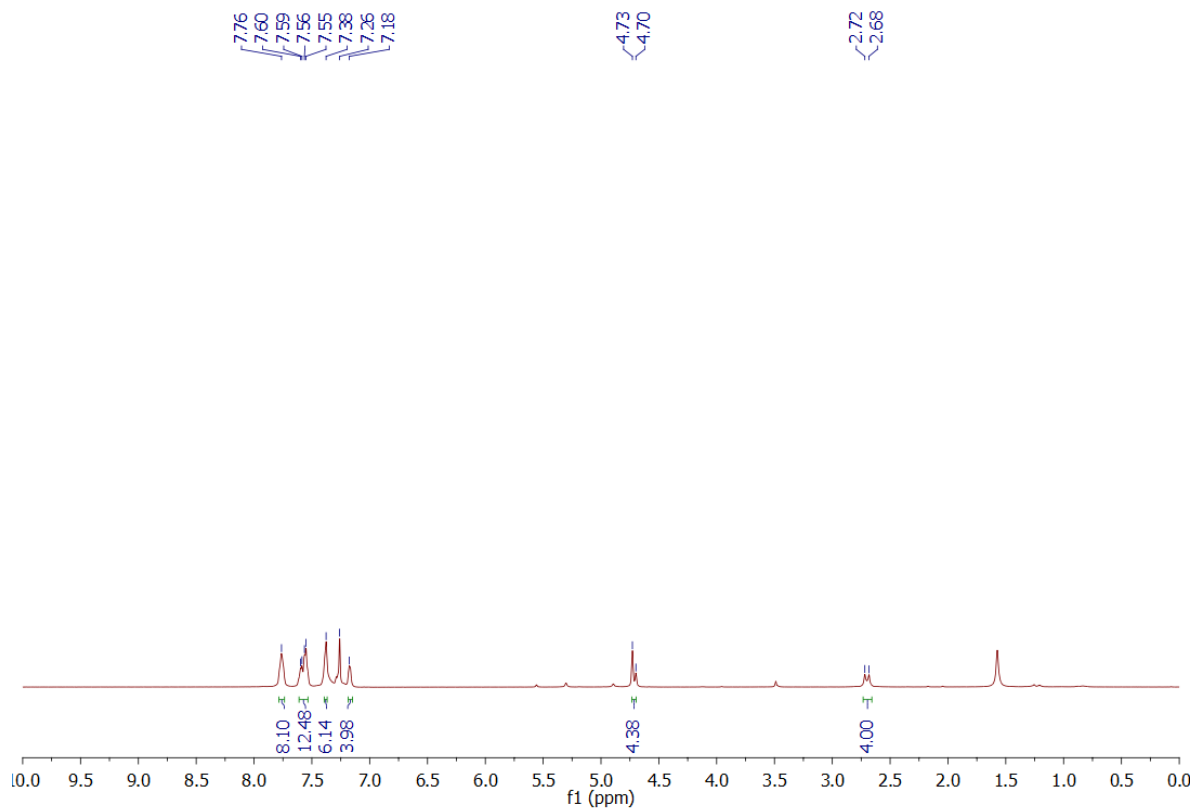

**Fig. S2a:**  $^1\text{H}$  NMR spectrum (500 MHz,  $\text{CDCl}_3$ ) of complex **1**.

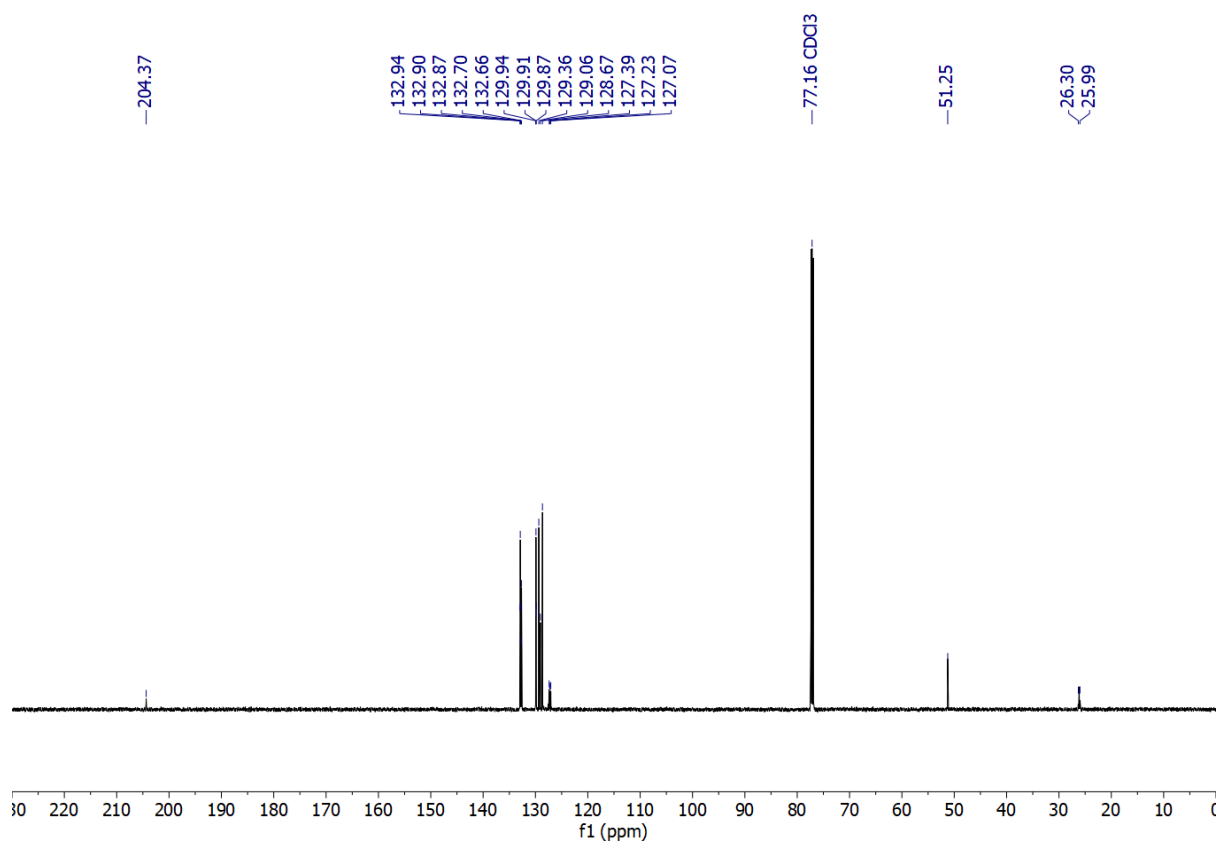

**Fig. S2b:**  $^{13}\text{C}\{^1\text{H}\}$  NMR spectrum (125 MHz,  $\text{CDCl}_3$ ) of complex **1**.

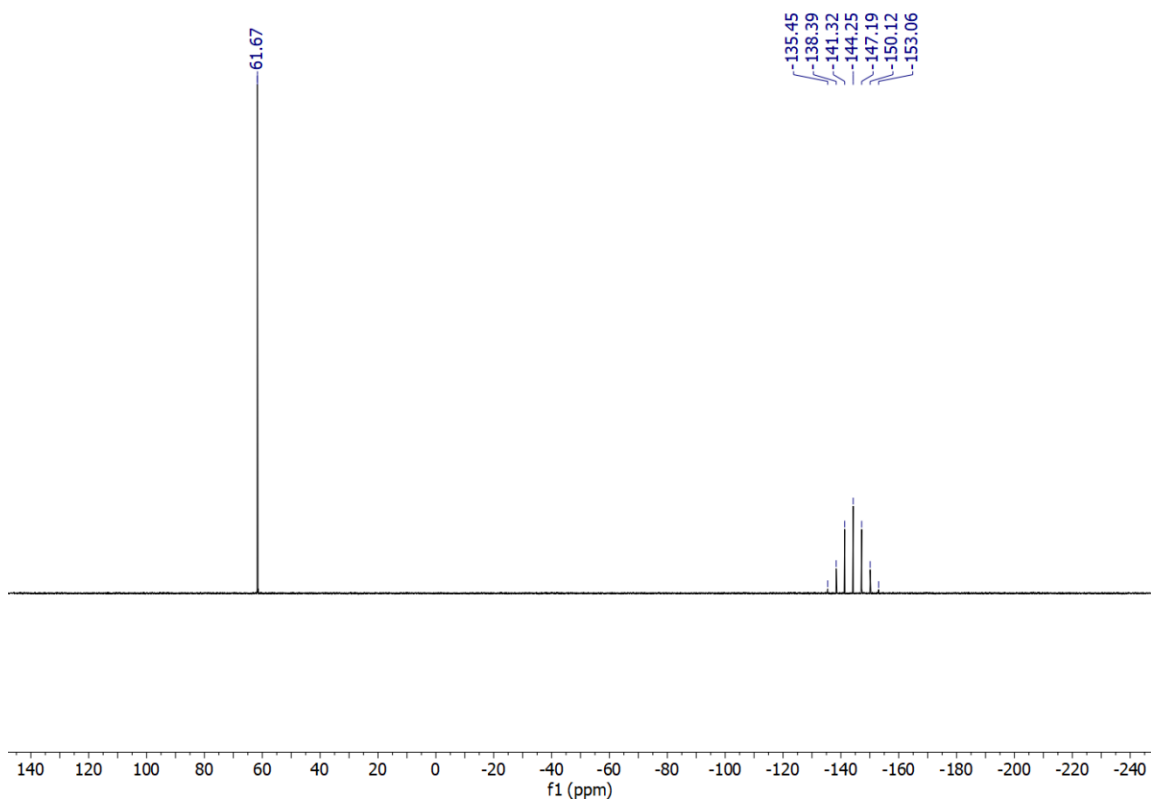

**Fig. S2c:**  $^{31}\text{P}\{^1\text{H}\}$  NMR spectrum (202 MHz,  $\text{CDCl}_3$ ) of complex **1**.

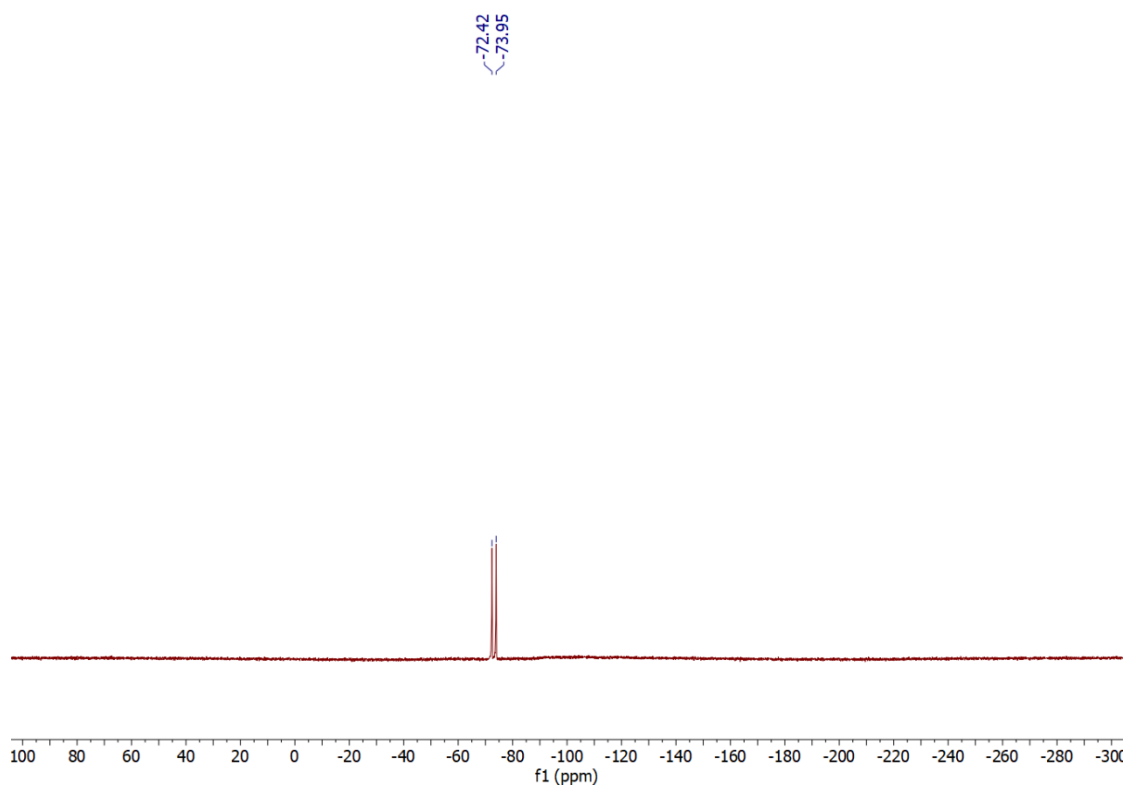

**Fig. S2d:**  $^{19}\text{F}\{^1\text{H}\}$  NMR spectrum (470 MHz,  $\text{CDCl}_3$ ) of complex **1**.

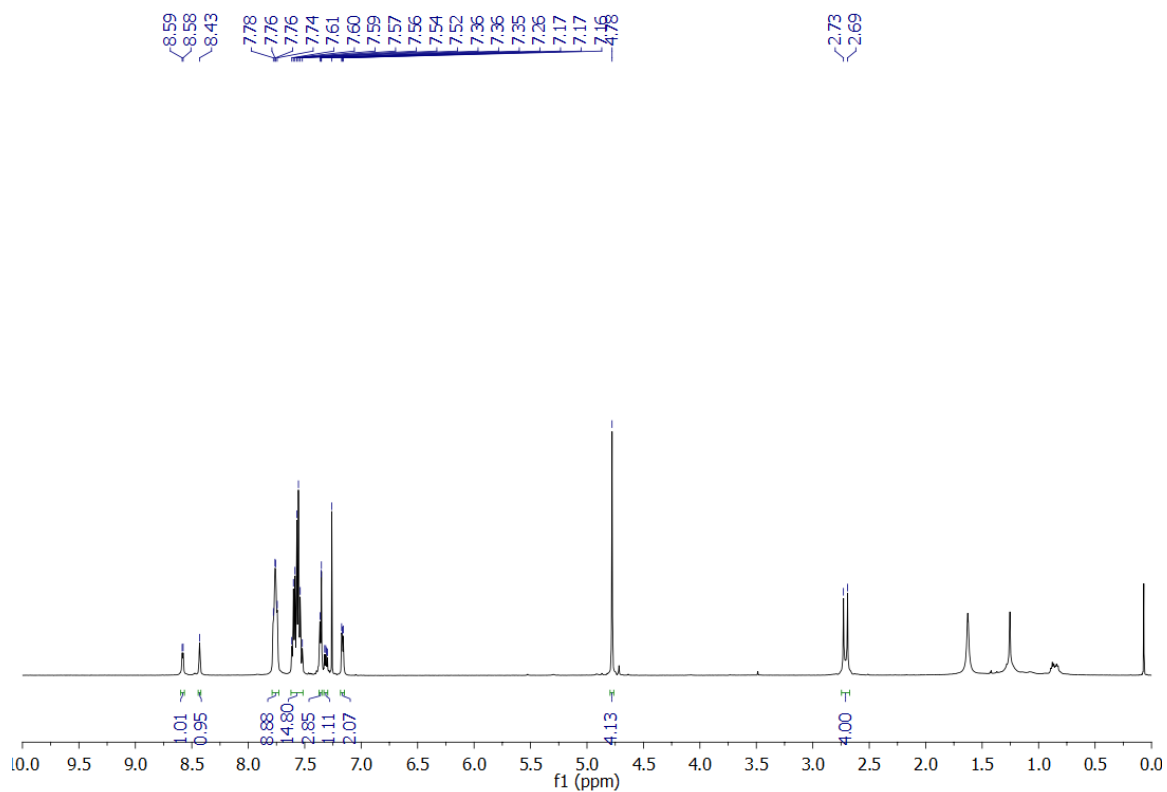

**Fig. S2e:**  $^1\text{H}$  NMR spectrum (500 MHz,  $\text{CDCl}_3$ ) of complex **2**.

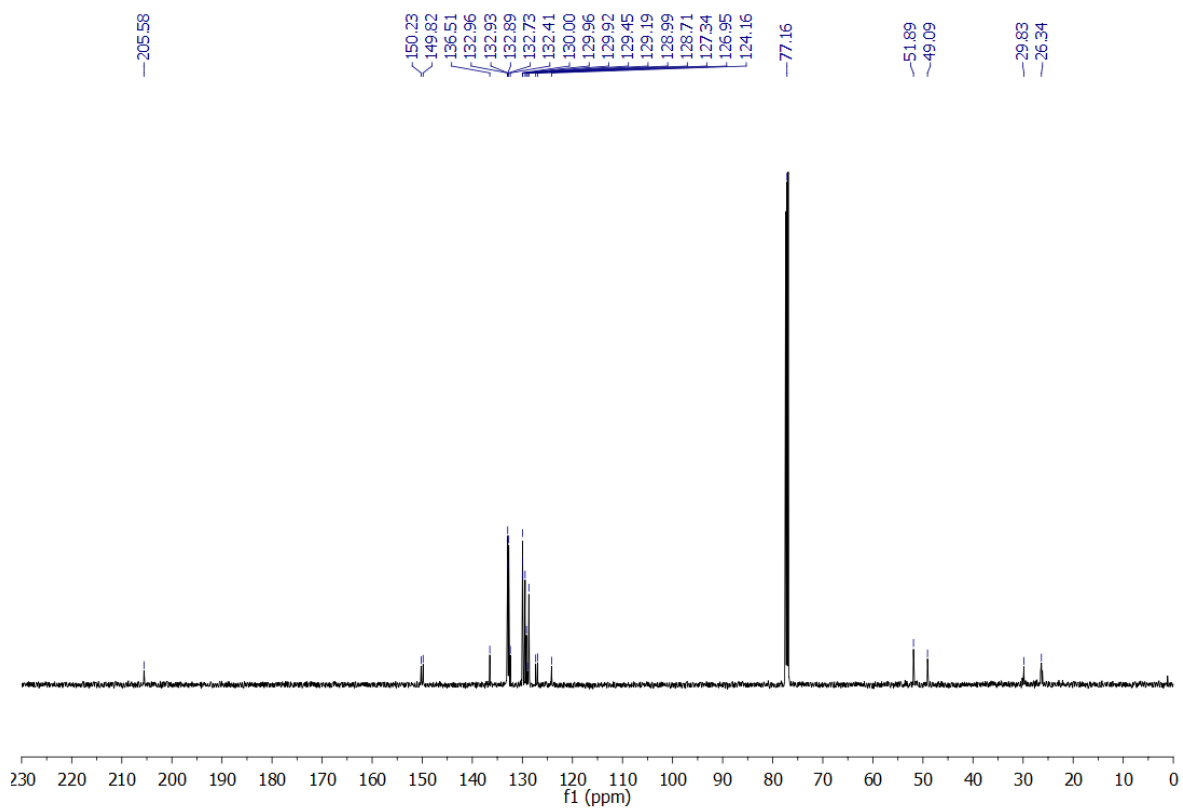

**Fig. S2f:**  $^{13}\text{C}\{^1\text{H}\}$  NMR spectrum (125 MHz,  $\text{CDCl}_3$ ) of complex **2**.

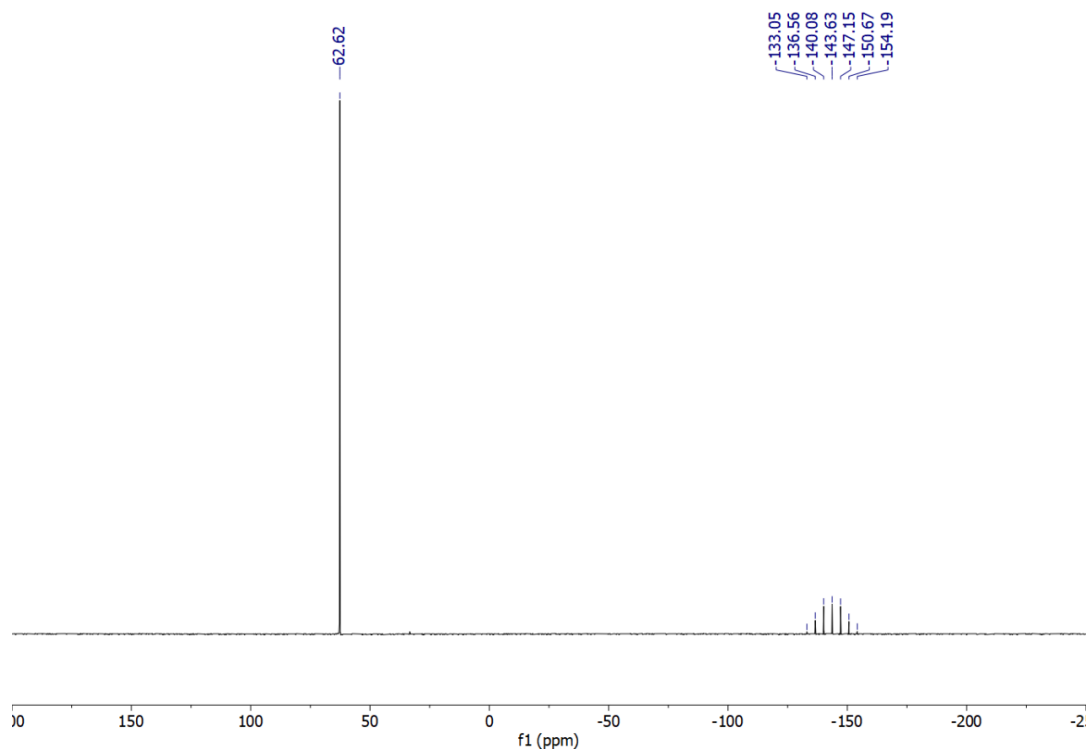

**Fig. S2g:** <sup>31</sup>P{<sup>1</sup>H} NMR spectrum (202 MHz, CDCl<sub>3</sub>) of complex **2**.

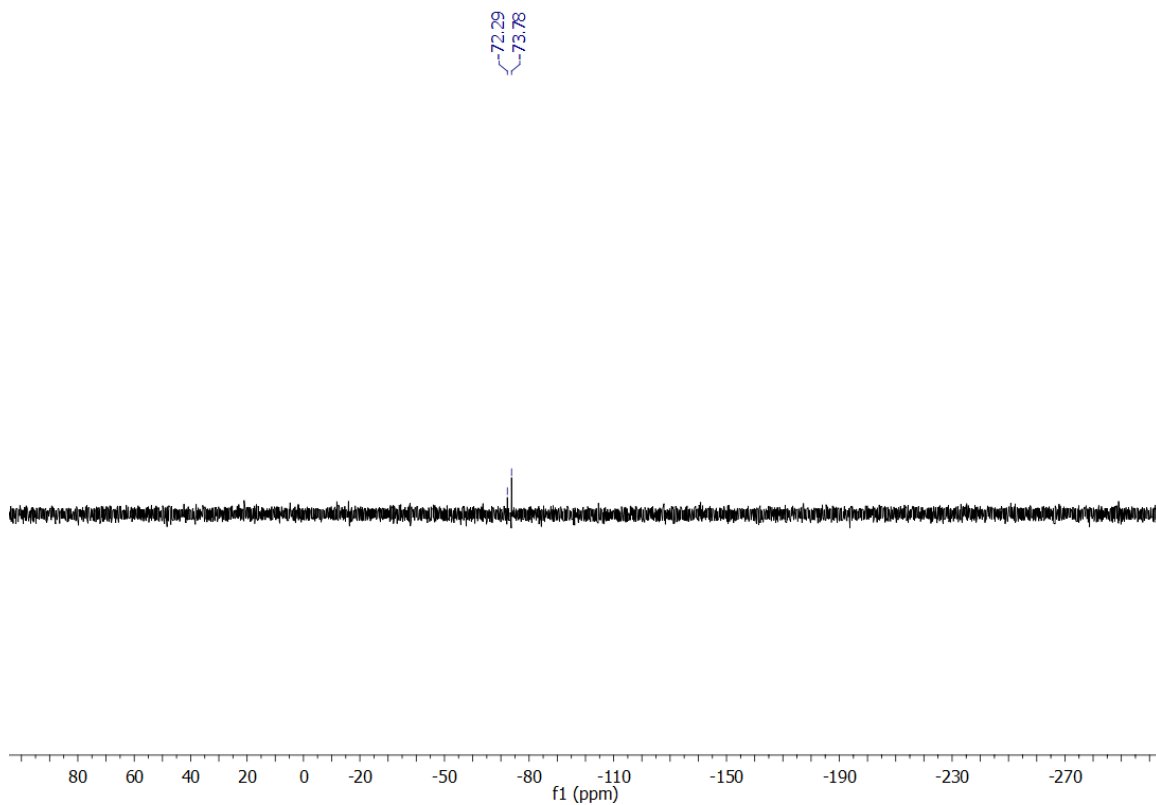

**Fig. S2h:** <sup>19</sup>F{<sup>1</sup>H} NMR spectrum (470 MHz, CDCl<sub>3</sub>) of complex **2**.

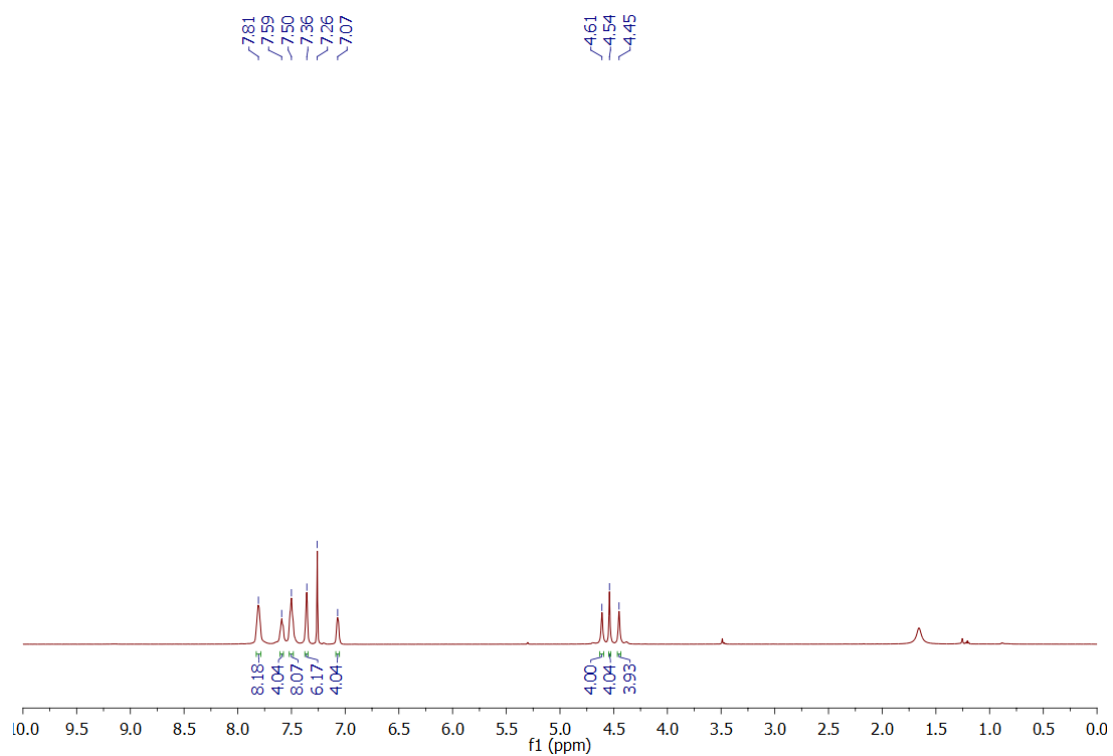

**Fig. S2i:**  $^1\text{H}$  NMR spectrum (500 MHz,  $\text{CDCl}_3$ ) of complex **3**.

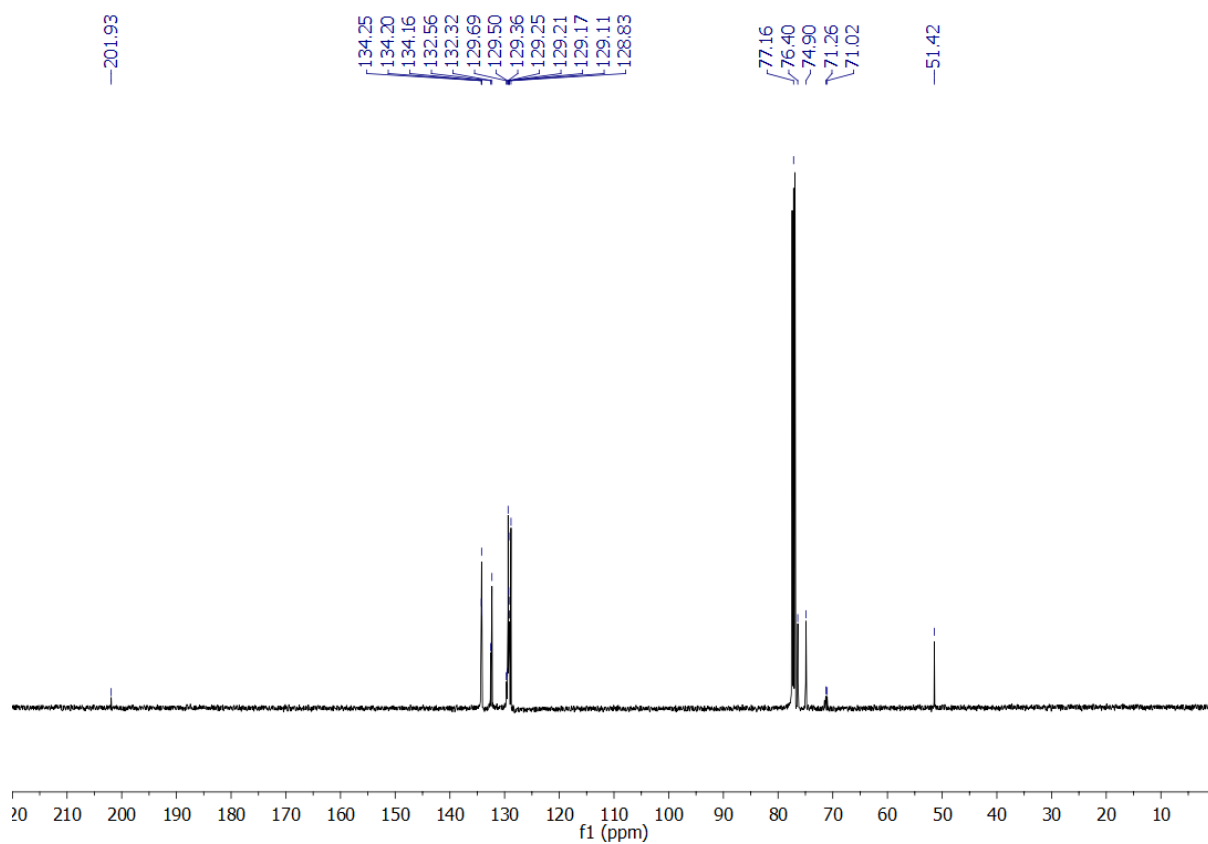

**Fig. S2j:**  $^{13}\text{C}\{^1\text{H}\}$  NMR spectrum (125 MHz,  $\text{CDCl}_3$ ) of complex **3**.



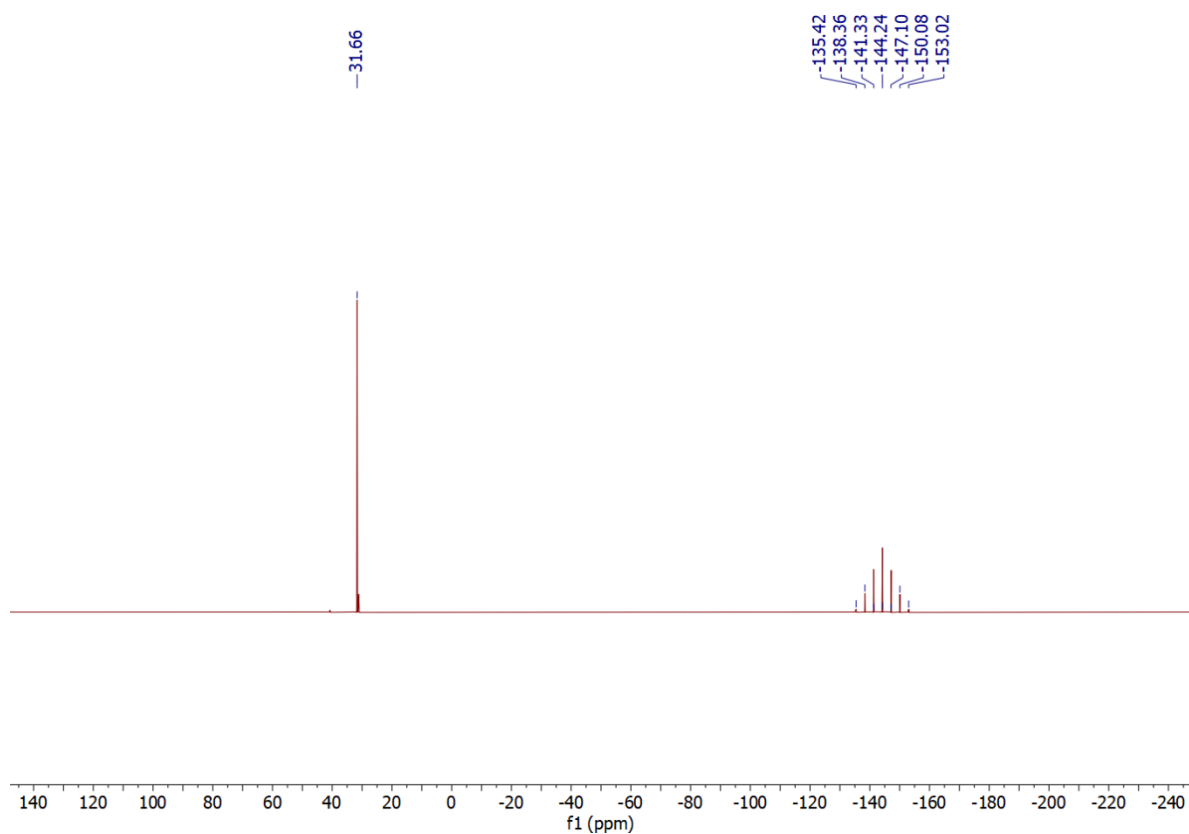

**Fig. S2k:**  $^{31}\text{P}\{^1\text{H}\}$  NMR spectrum (202 MHz,  $\text{CDCl}_3$ ) of complex **3**.

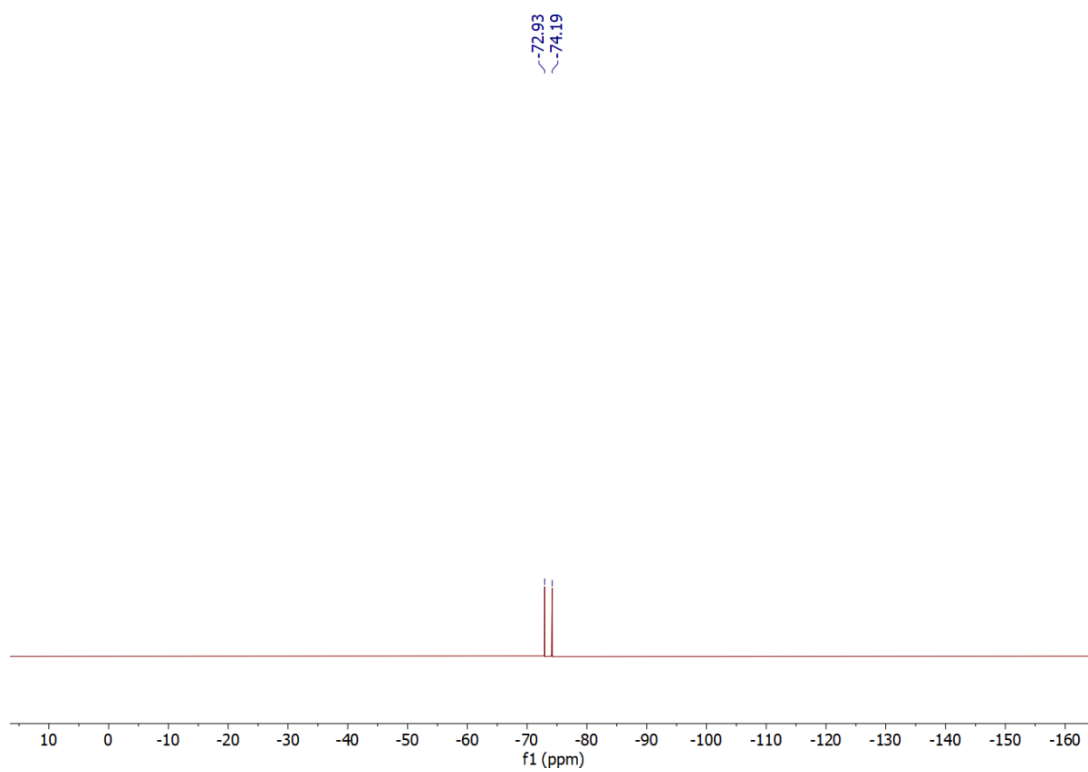

**Fig. S2l:**  $^{19}\text{F}\{^1\text{H}\}$  NMR spectrum (470 MHz,  $\text{CDCl}_3$ ) of complex **3**.

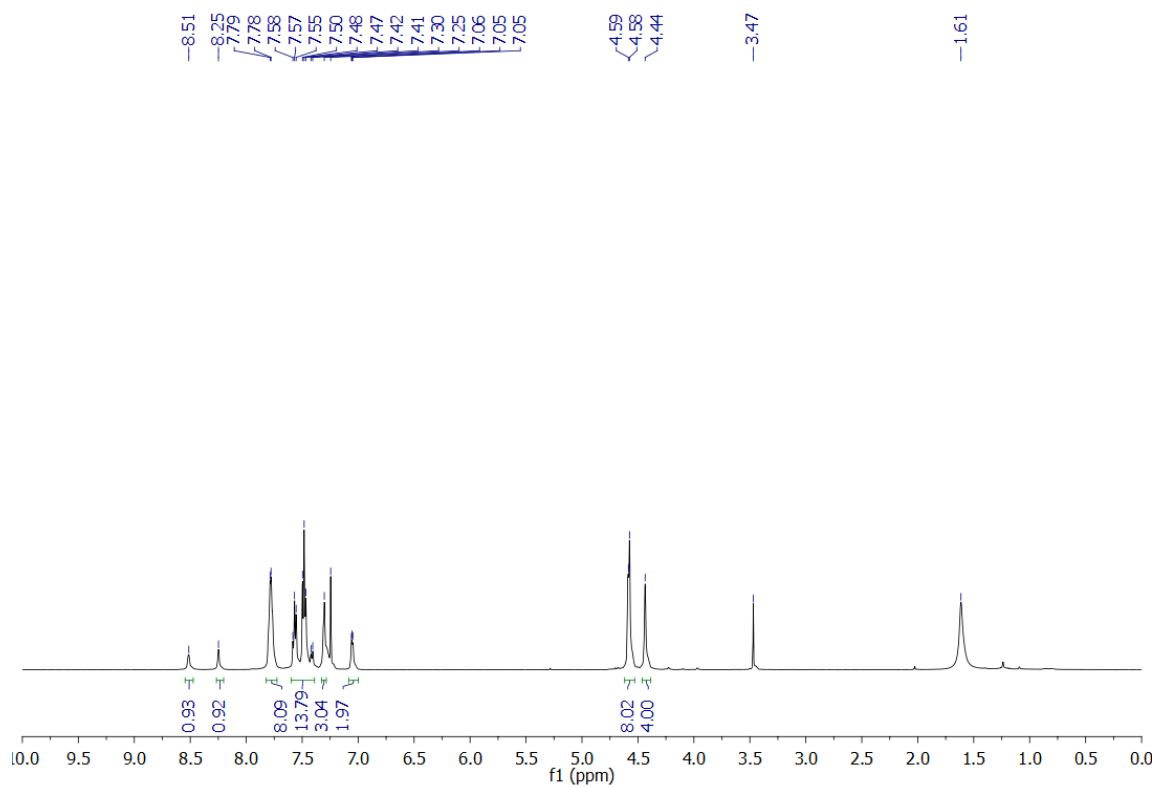

**Fig. S2m:**  $^1\text{H}$  NMR spectrum (500 MHz,  $\text{CDCl}_3$ ) of complex **4**.

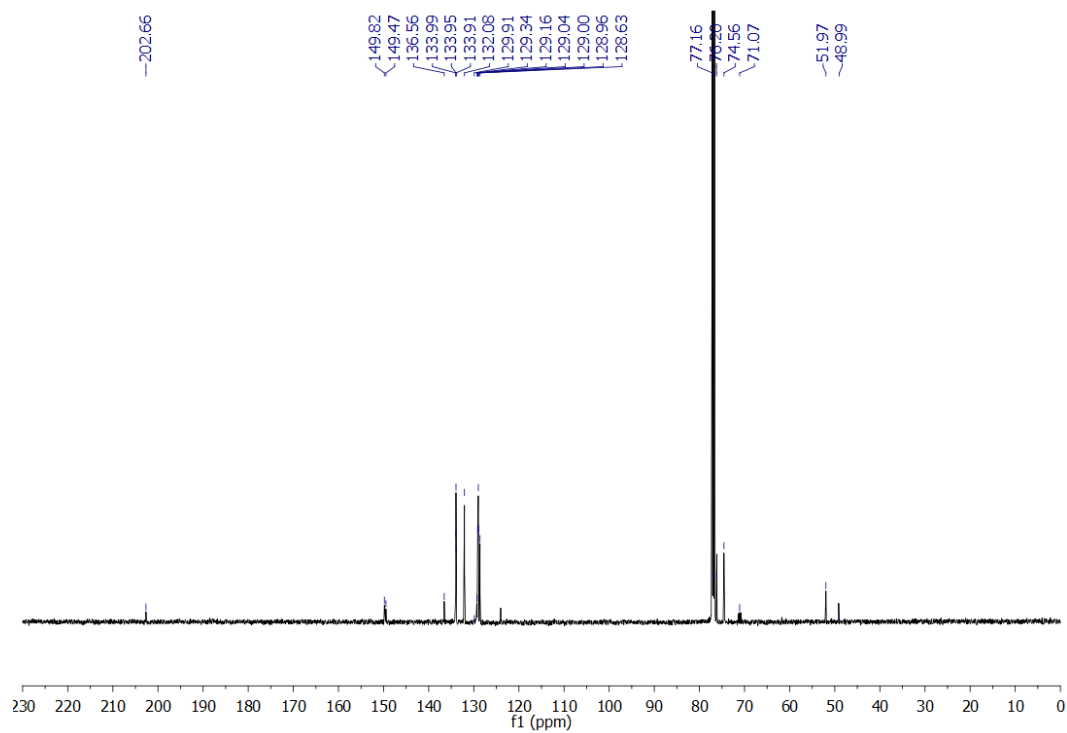

**Fig. S2n:**  $^{13}\text{C}\{^1\text{H}\}$  NMR spectrum (125 MHz,  $\text{CDCl}_3$ ) of complex **4**.

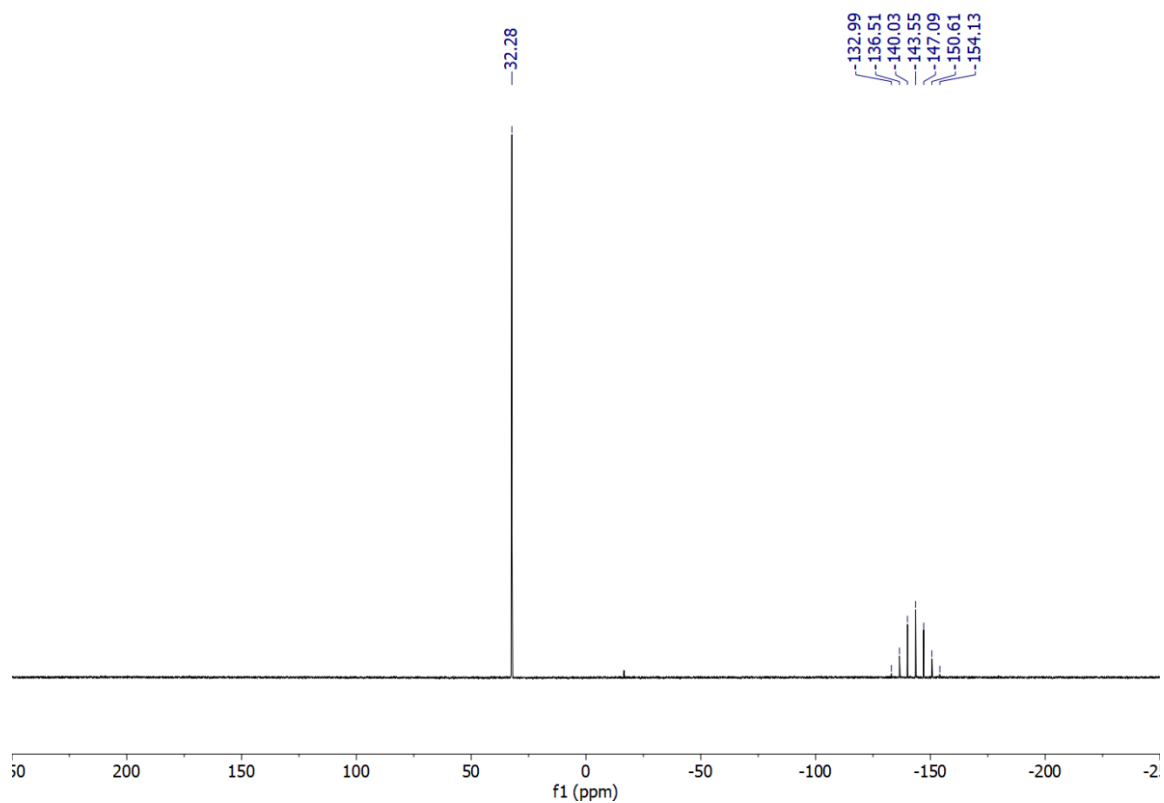

**Fig. S2o:**  $^{31}\text{P}\{^1\text{H}\}$  NMR spectrum (202 MHz,  $\text{CDCl}_3$ ) of complex **4**.

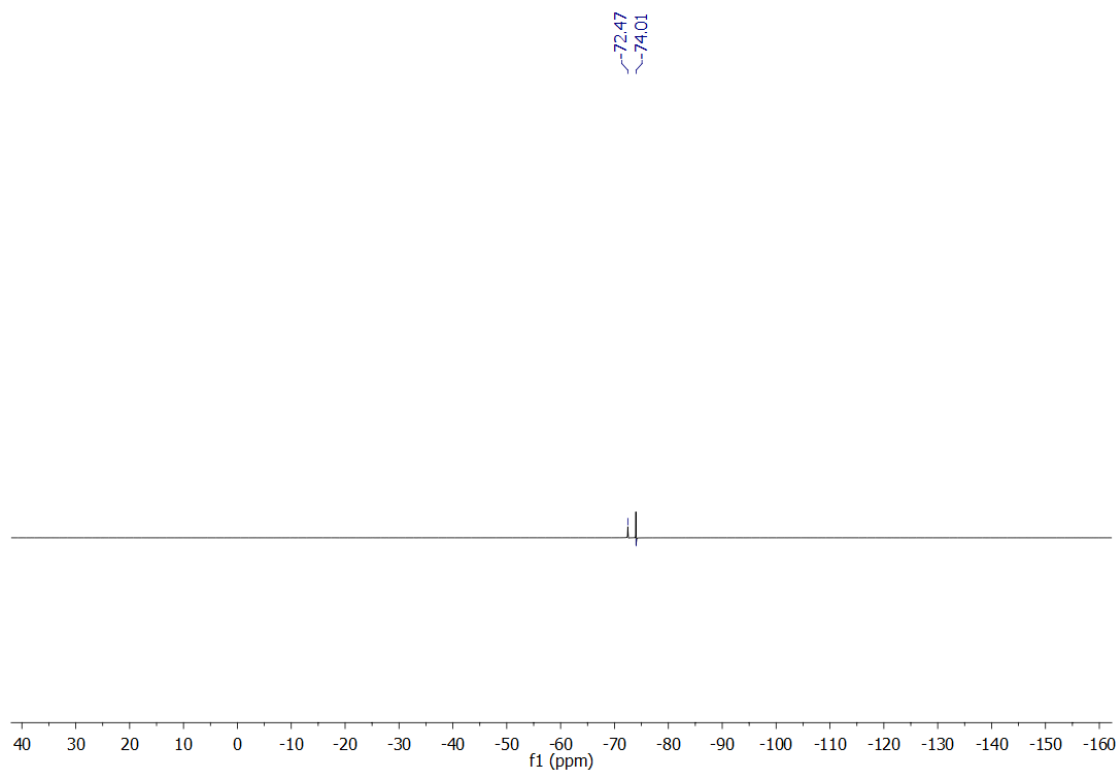

**Fig. S2p:**  $^{19}\text{F}\{^1\text{H}\}$  NMR spectrum (470 MHz,  $\text{CDCl}_3$ ) of complex **4**.

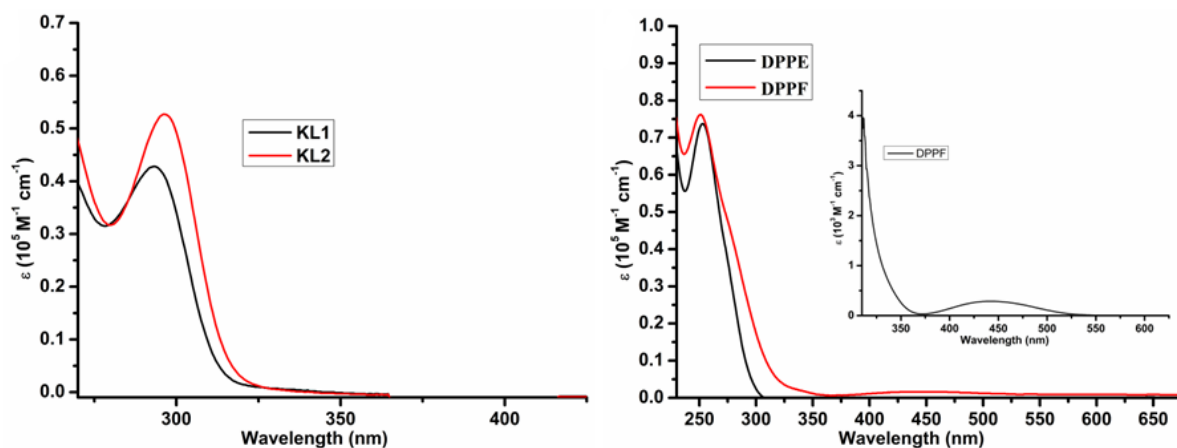

**Fig. S3** UV-Vis absorption spectra of dithiocarbamate (KL1-KL2) in methanol, and diphosphine (dppe, dppf) ligands in dichloromethane solution at  $10^{-5}$  and  $10^{-3}$  molar concentration.

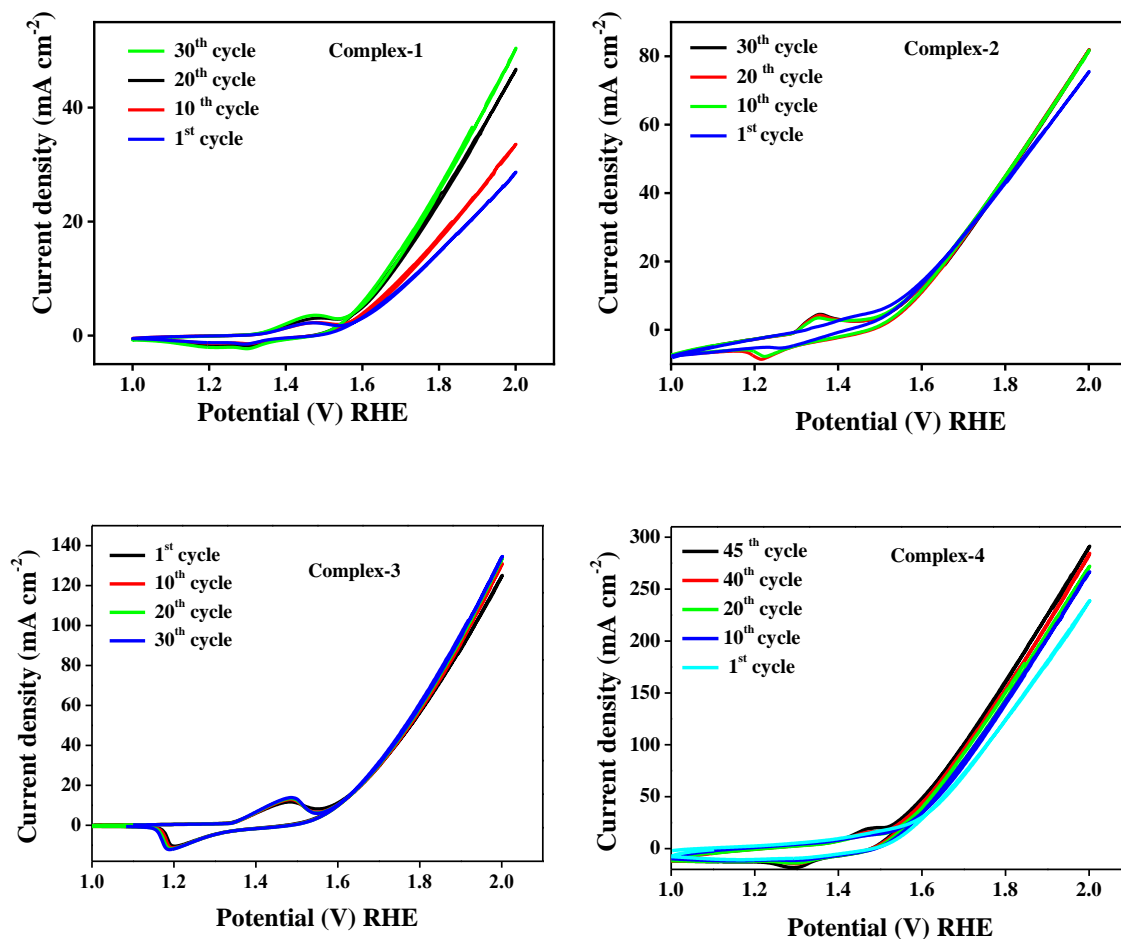

**Fig. S4:** CV profiles for the electrochemical activation of (a) complex 1; (b) complex 2; (c) complex 3; and (d) complex 4 (scan rate  $20 \text{ mV s}^{-1}$ , without  $iR$  correction).

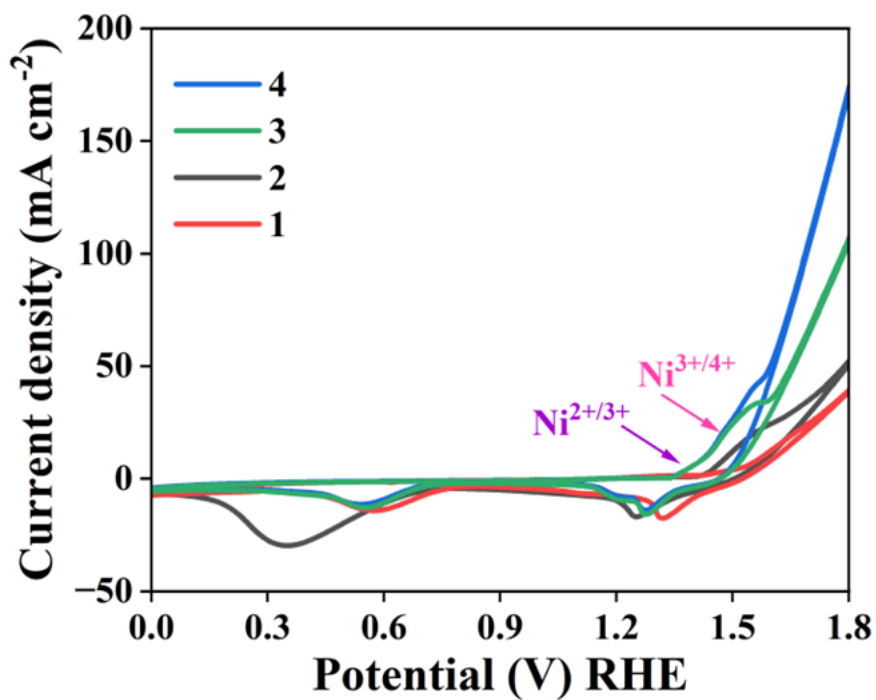

Fig. S5: CV profiles of anodically activated complexes 1- 4@CC.

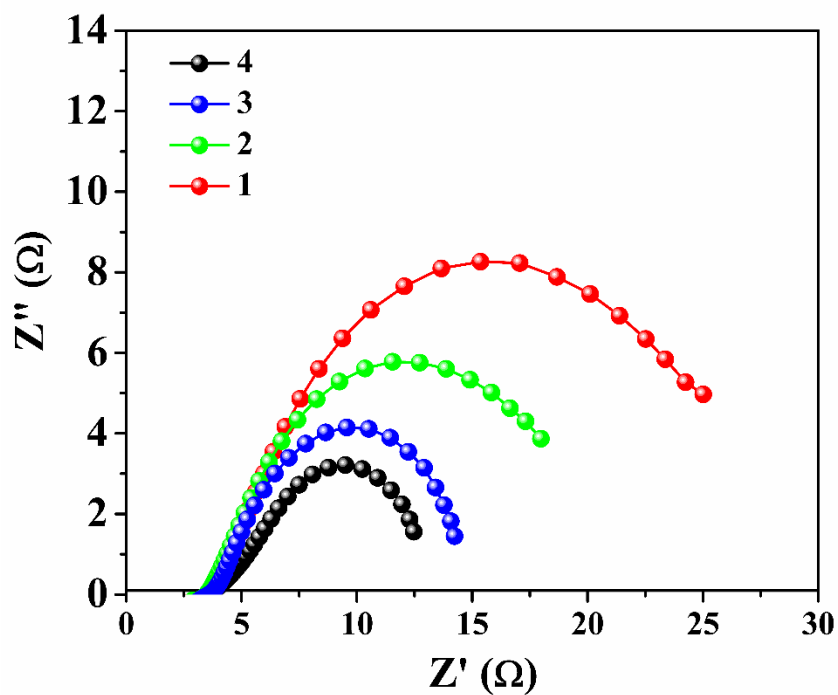

Fig. S6: EIS curves showing the lowest charge transfer resistance for the active catalyst derived from complex 4 compared to active catalysts derived from complexes 1-3.

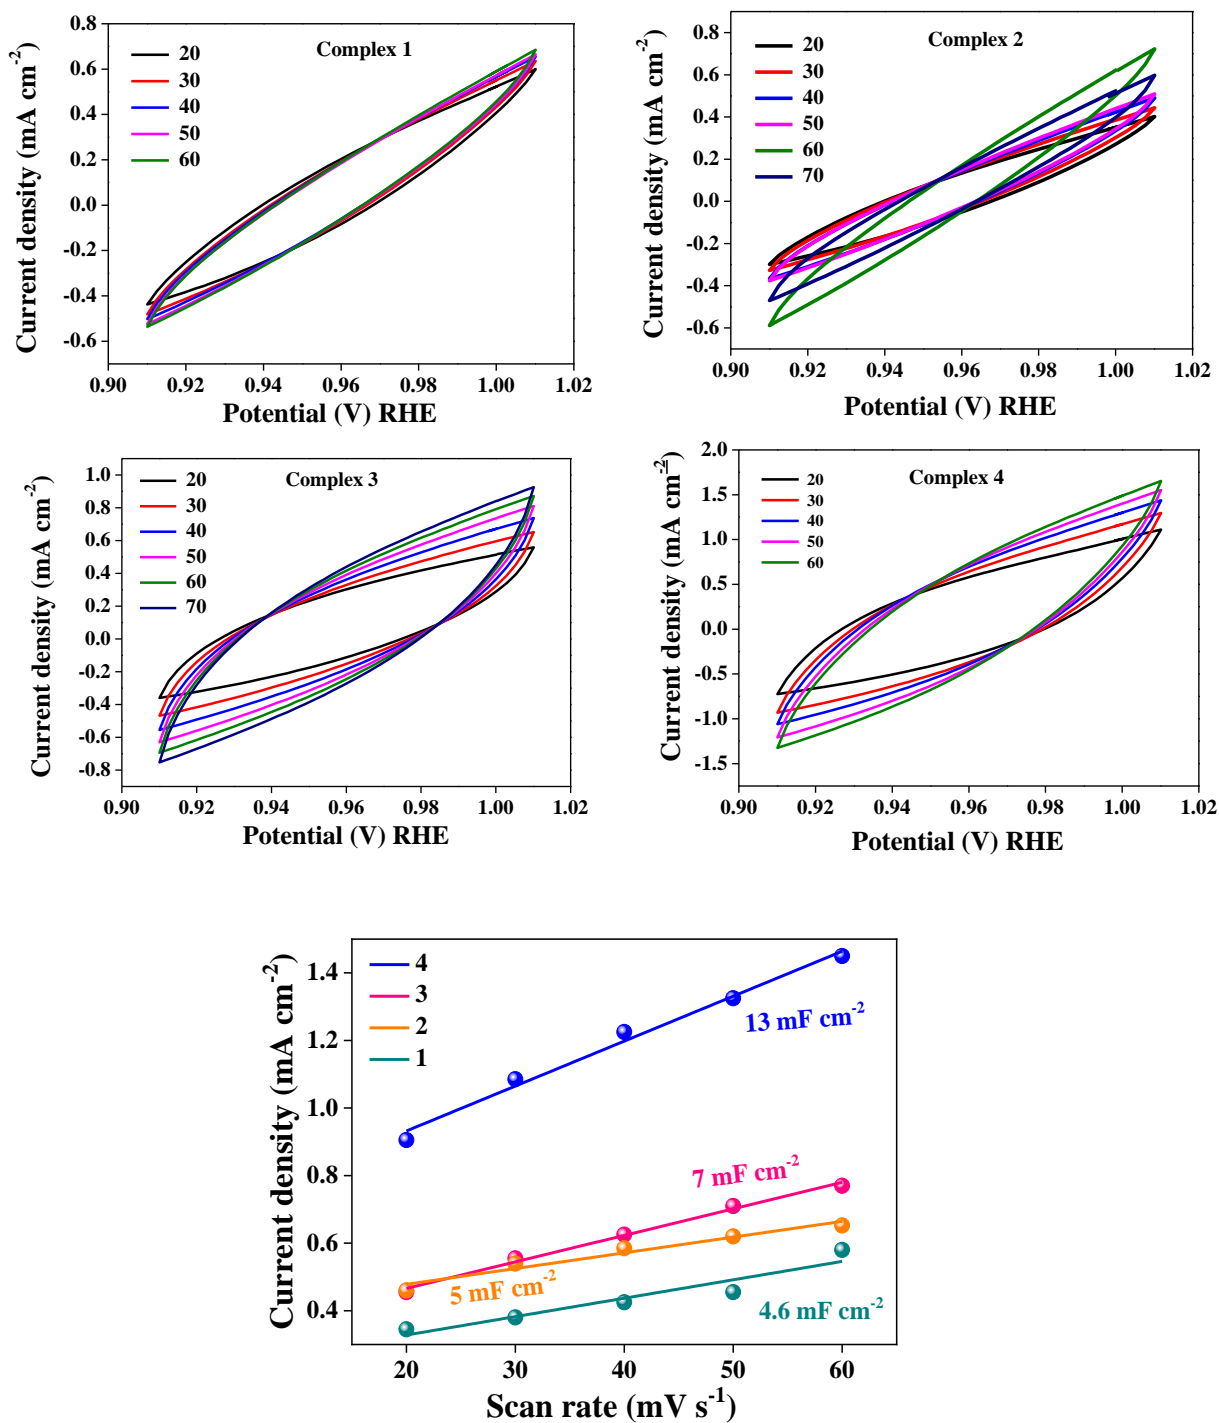

**Fig. S7:** CV of the activated complexes in the non-faradaic potential region with the variation in the scan rate and the determination of  $C_{dl}$  in 1.0 M KOH solution.

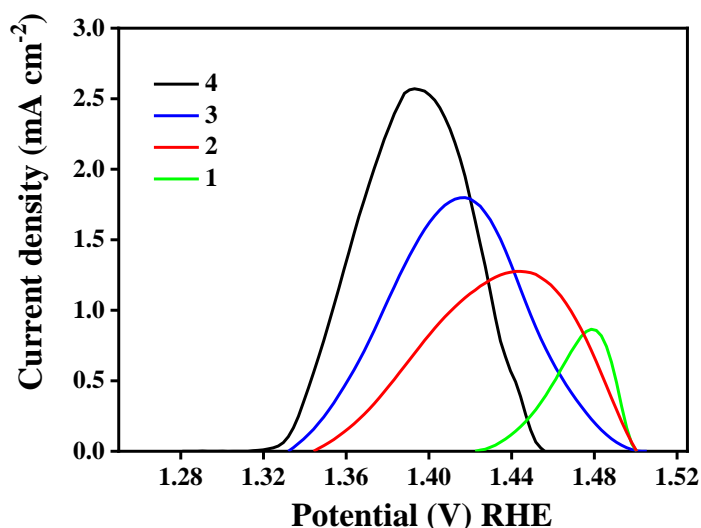

**Fig. S8:** Redox peak integration for the determination of number of active sites for the active catalyst derived from complexes 1-4.

#### **Equation S1. Determination of the number of active sites**

The number of active sites in the catalysts was calculated by the redox peak integration method.

##### **Complex 4:**

Calculated area associated with the oxidation peak =  $0.181 \times 10^{-3} \text{ V A}$

Hence the associated charge was =  $0.181 \times 10^{-3} \text{ V A} / 0.005 \text{ V s}^{-1}$

$$= 36.2 \times 10^{-3} \text{ As}$$

$$= 36.2 \times 10^{-3} \text{ C}$$

Now, the number of electron transferred was =  $36.2 \times 10^{-3} \text{ C} / 1.602 \times 10^{-19} \text{ C}$

The number of electron calculated above was same as the number of surface active site due to single electron transfer involving  $\text{Ni}^{2+}$  to  $\text{Ni}^{3+}$  oxidation process

Hence,

The surface active site of 4 that participated in OER =  $22.48 \times 10^{16}$

##### **Complex 3:**

Calculated area associated with the oxidation peak =  $0.156 \times 10^{-3} \text{ V A}$

Hence the associated charge was =  $0.156 \times 10^{-3} \text{ V A} / 0.005 \text{ V s}^{-1}$

$$= 31.2 \times 10^{-3} \text{ As}$$

$$= 31.2 \times 10^{-3} \text{ C}$$

Now, the number of electron transferred was =  $31.2 \times 10^{-3} \text{ C} / 1.602 \times 10^{-19} \text{ C}$

$$= 19.47 \times 10^{16}$$

The number of electron calculated above was same as the number of surface active site due to single electron transfer involving  $\text{Ni}^{2+}$  to  $\text{Ni}^{3+}$  oxidation process

Hence,

The surface-active site of 3 that participated in OER =  $19.47 \times 10^{16}$

### **Complex 2:**

Calculated area associated with the oxidation peak =  $0.140 \times 10^{-3}$  V A

Hence the associated charge was =  $0.140 \times 10^{-3}$  V A /  $0.005$  V  $\text{s}^{-1}$

$$= 28 \times 10^{-3} \text{ As}$$

$$= 20 \times 10^{-3} \text{ C}$$

Now, the number of electron transferred was =  $28 \times 10^{-3}$  C /  $1.602 \times 10^{-19}$  C

$$17.47 \times 10^{16}$$

The number of electron calculated above was same as the number of surface active site due to single electron transfer involving  $\text{Ni}^{2+}$  to  $\text{Ni}^{3+}$  oxidation process

Hence,

The surface-active site of 2 that participated in OER =  $17.47 \times 10^{16}$

### **Complex 1:**

Calculated area associated with the oxidation peak =  $0.056 \times 10^{-3}$  V A

Hence the associated charge was =  $0.056 \times 10^{-3}$  V A /  $0.005$  V  $\text{s}^{-1}$

$$= 11.2 \times 10^{-3} \text{ As}$$

$$= 11.2 \times 10^{-3} \text{ C}$$

Now, the number of electron transferred was =  $11.2 \times 10^{-3}$  C /  $1.602 \times 10^{-19}$  C

$$= 6.99 \times 10^{16}$$

The number of electron calculated above was the same as the number of the surface-active sites due to single electron transfer involving  $\text{Ni}^{2+}$  to  $\text{Ni}^{3+}$  oxidation process

Hence,

The surface-active site of 1 that participated in OER =  $6.99 \times 10^{16}$

### **Equation S2. Determination of Turn-Over Frequency (TOF)**

The TOF of the complexes can be determined using the equation

$$\text{TOF} = (j \times N_A) / (4 \times F \times n)$$

Where,  $j$  = current density at 1.48 V vs. RHE

$N_A$  = Avogadro number

$F$  = Faraday constant



n = number of active Ni-sites

**For Complex 4:**

$$\text{TOF} = (10 \times 10^{-3}) (6.023 \times 10^{23}) / (96485) \times (4) \times (22.48 \times 10^{16})$$

$$\text{TOF} = 6.94 \times 10^{-2} \text{ s}^{-1}$$

**For Complex 3:**

$$\text{TOF} = (4.02 \times 10^{-3}) (6.023 \times 10^{23}) / (96485) \times (4) \times (19.47 \times 10^{16})$$

$$\text{TOF} = 3.38 \times 10^{-2} \text{ s}^{-1}$$

**For Complex 2:**

$$\text{TOF} = (1.48 \times 10^{-3}) (6.023 \times 10^{23}) / (96485) \times (4) \times (17.47 \times 10^{16})$$

$$\text{TOF} = 1.32 \times 10^{-2} \text{ s}^{-1}$$

**For Complex 1:**

$$\text{TOF} = (0.82 \times 10^{-3}) (6.023 \times 10^{23}) / (96485) \times (4) \times (6.99 \times 10^{16})$$

$$\text{TOF} = 1.78 \times 10^{-2} \text{ s}^{-1}$$

**Equation S3: Calculation of exchange current density**

The exchange current density of the complexes can be determined using the equation (*J. Energy Chem.*, 2022, **67**, 101-137)

$$J_0 = RT/nFR_{ct}$$

Where, **R** = gas constant (8.314 J mol<sup>-1</sup> K<sup>-1</sup>)

**T** = temperature (298 K)

**n** = number of electron transfer

**F** = Faraday's constant (96485 C mol<sup>-1</sup>)

**R<sub>ct</sub>** = charge transfer resistance (obtained from EIS)

| Active catalysts from | R <sub>ct</sub> value (Ω) | Exchange current density (A cm <sup>-2</sup> ) |
|-----------------------|---------------------------|------------------------------------------------|
| Complex 1@CC          | 21.63                     | 2.9 × 10 <sup>-4</sup>                         |
| Complex 2@CC          | 14.42                     | 4.4 × 10 <sup>-4</sup>                         |
| Complex 3@CC          | 10.92                     | 5.8 × 10 <sup>-4</sup>                         |
| Complex 4@CC          | 9.03                      | 7.1 × 10 <sup>-4</sup>                         |

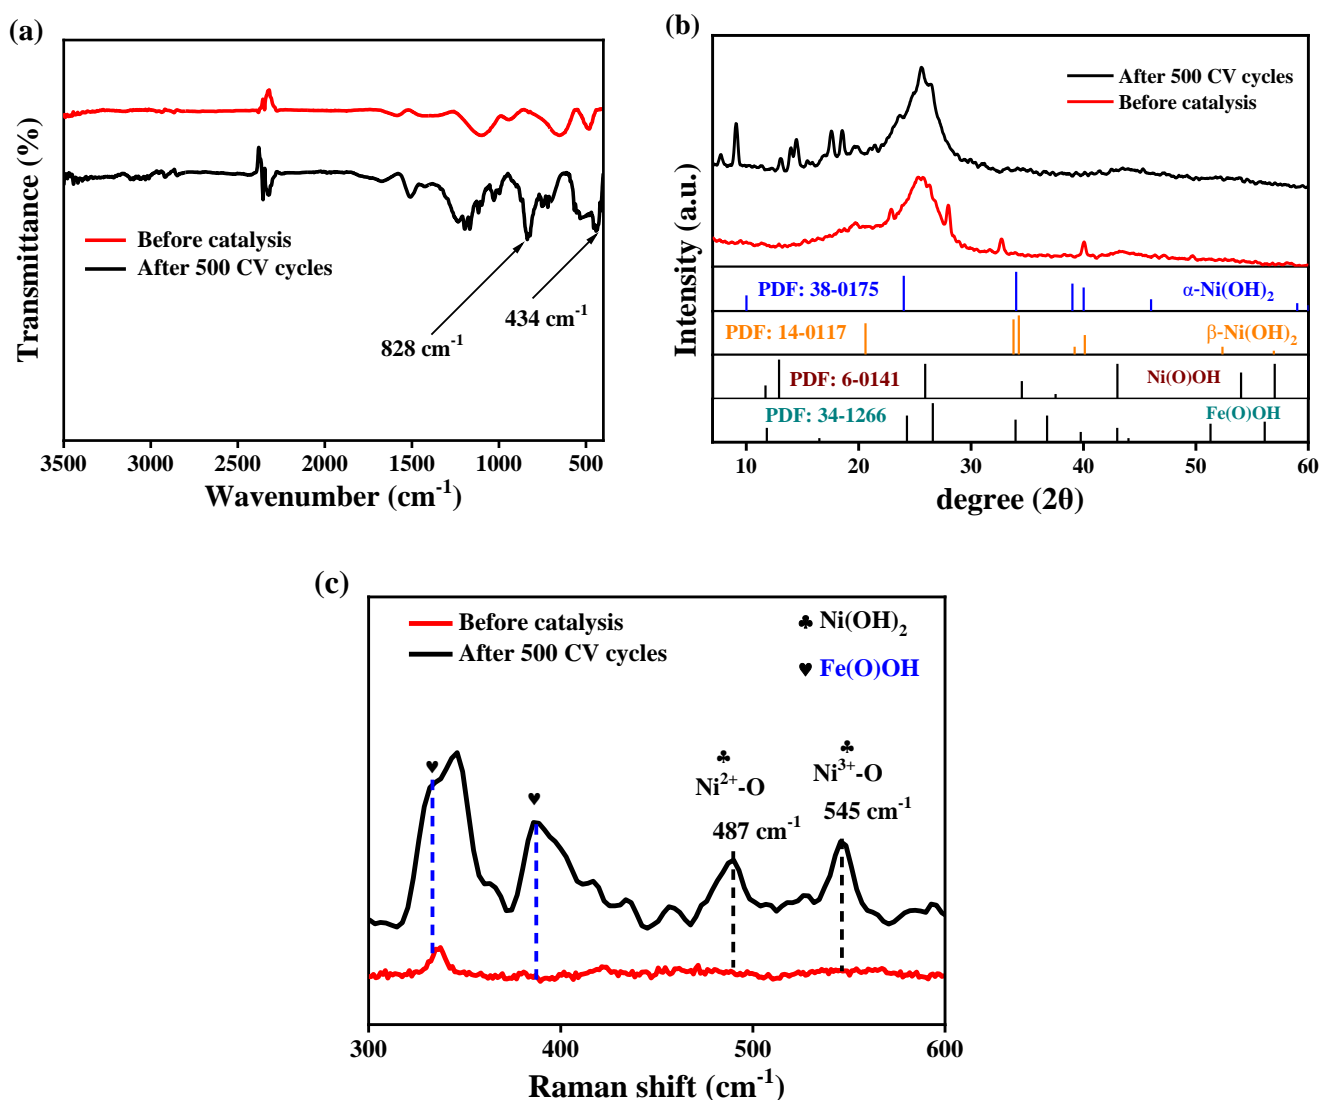

**Fig. S9.** (a) The FT-IR spectrum of active catalyst derived from complex **4**@CC after 500 CV cycles shows new peaks at  $828\text{ cm}^{-1}$  and  $434\text{ cm}^{-1}$ , which are attributed to the Ni–O bond stretching; (b) The powder XRD pattern of active catalyst derived from complex **4**@CC after 500 CV cycles indicates that the molecular structure has disappeared and transformed into Ni(OH)<sub>2</sub>/Ni(O)OH-  $\beta$ -Fe(O)OH. (c) The Raman spectra of complex **4** before and after the 500 CV cycles also demonstrate structural reconstruction. The appearance of two peaks at  $487\text{ cm}^{-1}$  and  $545\text{ cm}^{-1}$  confirms the formation of Ni(OH)<sub>2</sub>/Ni(O)OH, while the peaks at  $331\text{ cm}^{-1}$  and  $385\text{ cm}^{-1}$  demonstrate the  $\beta$ -phase of Fe(O)OH. (*Adv. Energy Mater.*, 2022, **12**, 2103383)

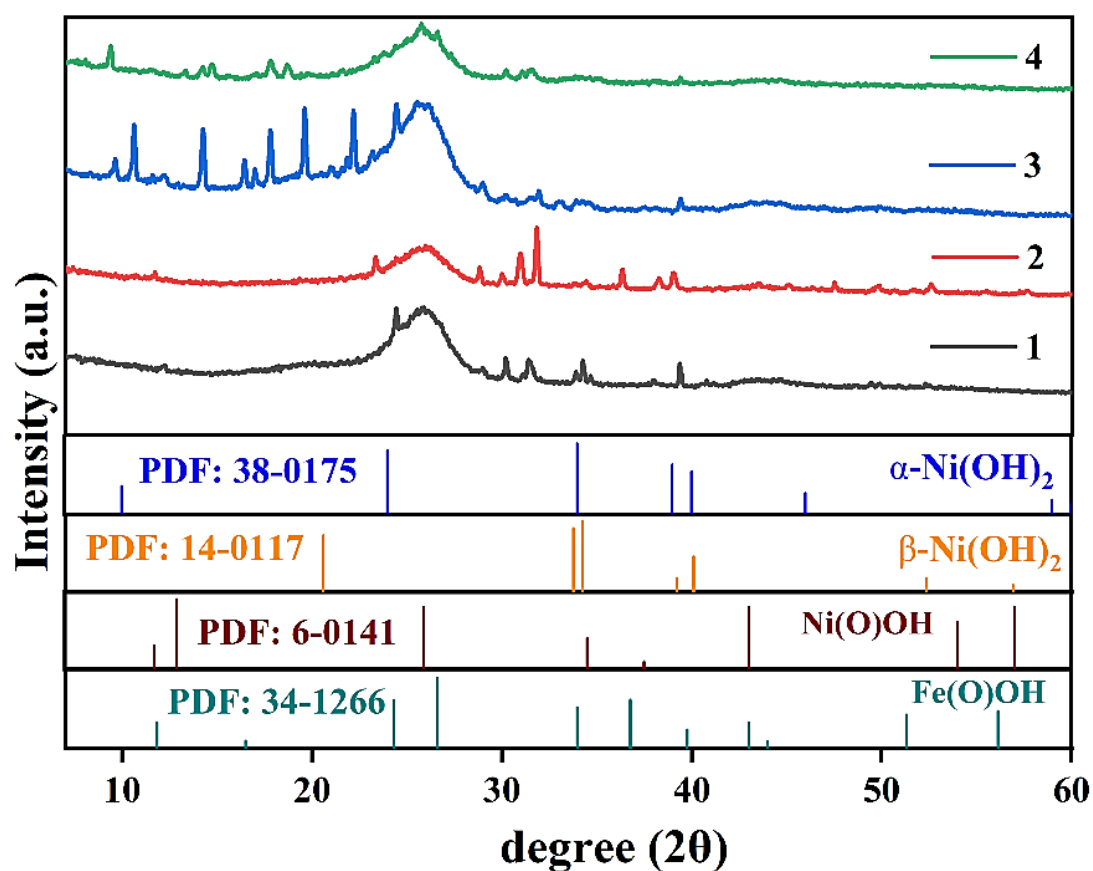

**Fig. S10:** The powder XRD patterns of active catalysts derived from complexes **1-4@CC** after 100 CV cycles. It was observed that the molecular structures had transformed into Ni(OH)<sub>2</sub>/Ni(O)OH (JCPDS No. 38-0715 and 6-0141). With complexes **1** and **3**, only Ni(OH)<sub>2</sub> peaks were detected, while with complexes **2** and **4**, both Ni(OH)<sub>2</sub> and Ni(O)OH peaks were observed. This suggests that complexes **1** and **3** were activated to Ni(OH)<sub>2</sub> as active catalyst, whereas complexes **2** and **4** were activated to both Ni(OH)<sub>2</sub> and Ni(O)OH as active catalyst. Additionally, the peaks for β-phase of Fe(O)OH (JCPDS No. 34-1266) were also detected in the active catalysts derived from complexes **3** and **4**.

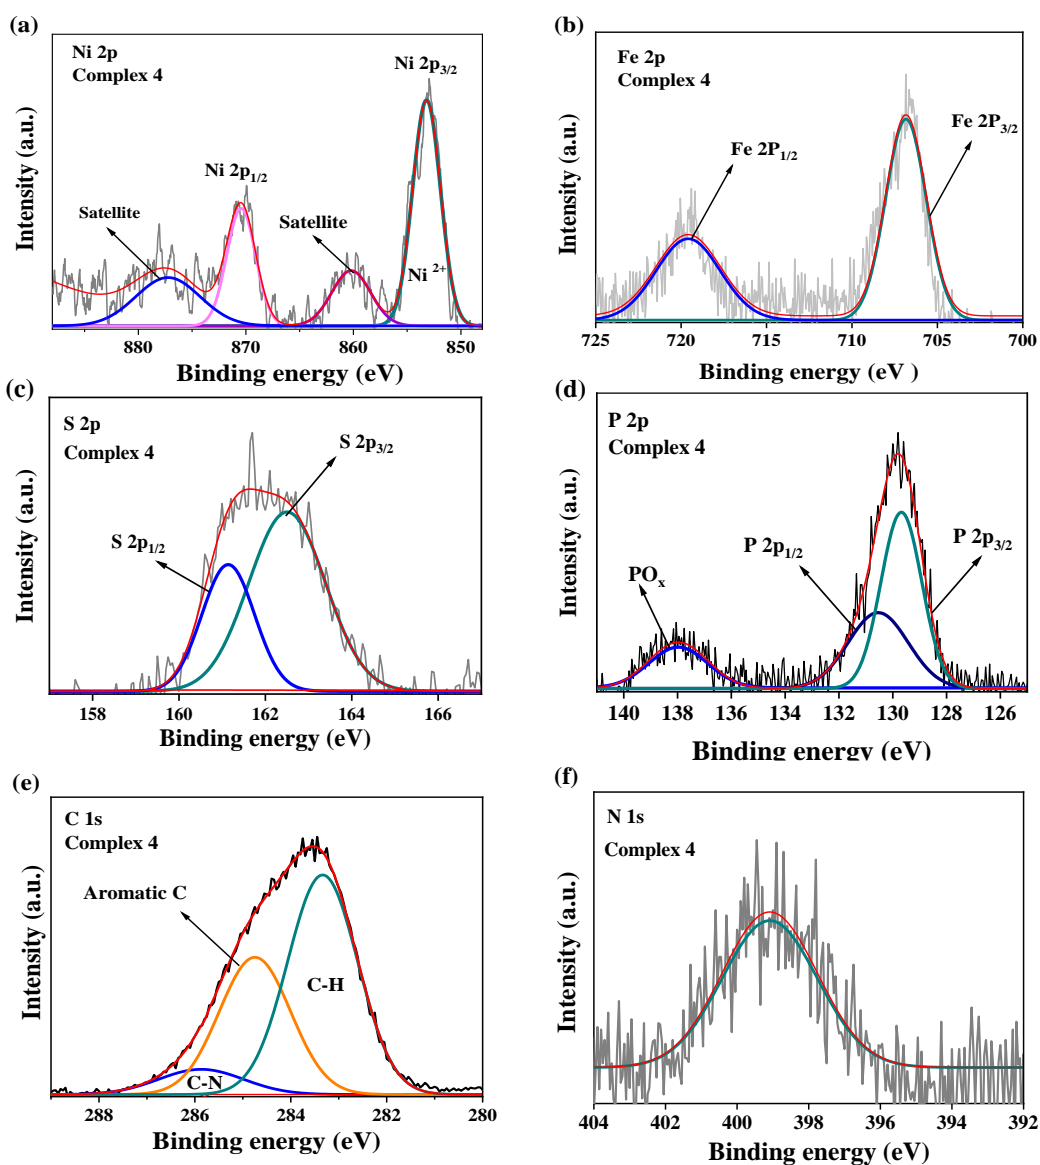

**Fig. S11:** XPS of synthesized complex **4**. **(a)** Ni 2p XPS showing the peaks at 853.19 eV and 870.53 eV assigned for the Ni 2p<sub>3/2</sub> and Ni 2p<sub>1/2</sub>, respectively. The peak at 853.93 eV was attributed to Ni<sup>2+</sup> species; **(b)** Fe 2p XPS showing the peaks at 706.81 eV and 719.65 eV assigned for the Fe 2p<sub>3/2</sub> and Fe 2p<sub>1/2</sub>, respectively; **(c)** S 2p XPS indicating two peaks at 161.13 eV and 162.49 eV attributed to the S 2p<sub>3/2</sub> and S 2p<sub>1/2</sub>, respectively; **(d)** P 2p XPS showing three peaks at 136.21 eV, 132.05 eV, and 130.55 eV, the peaks at 130.55 eV, and 132.05 eV were attributed to 2p<sub>3/2</sub> and 2p<sub>1/2</sub> while 136.21 eV corresponds to PO<sub>x</sub> species; (*J. Chem. Phys.*, 1987, **87**, 5002–5006); **(e)** C 1s XPS showing three peaks at 285.94 eV, 284.75 eV and 283.33 eV corresponded to C-N bond, aromatic C and C-H bond respectively; **(f)** N 1s XPS indicated a peak corresponding to the C–N (398.51 eV) bond.

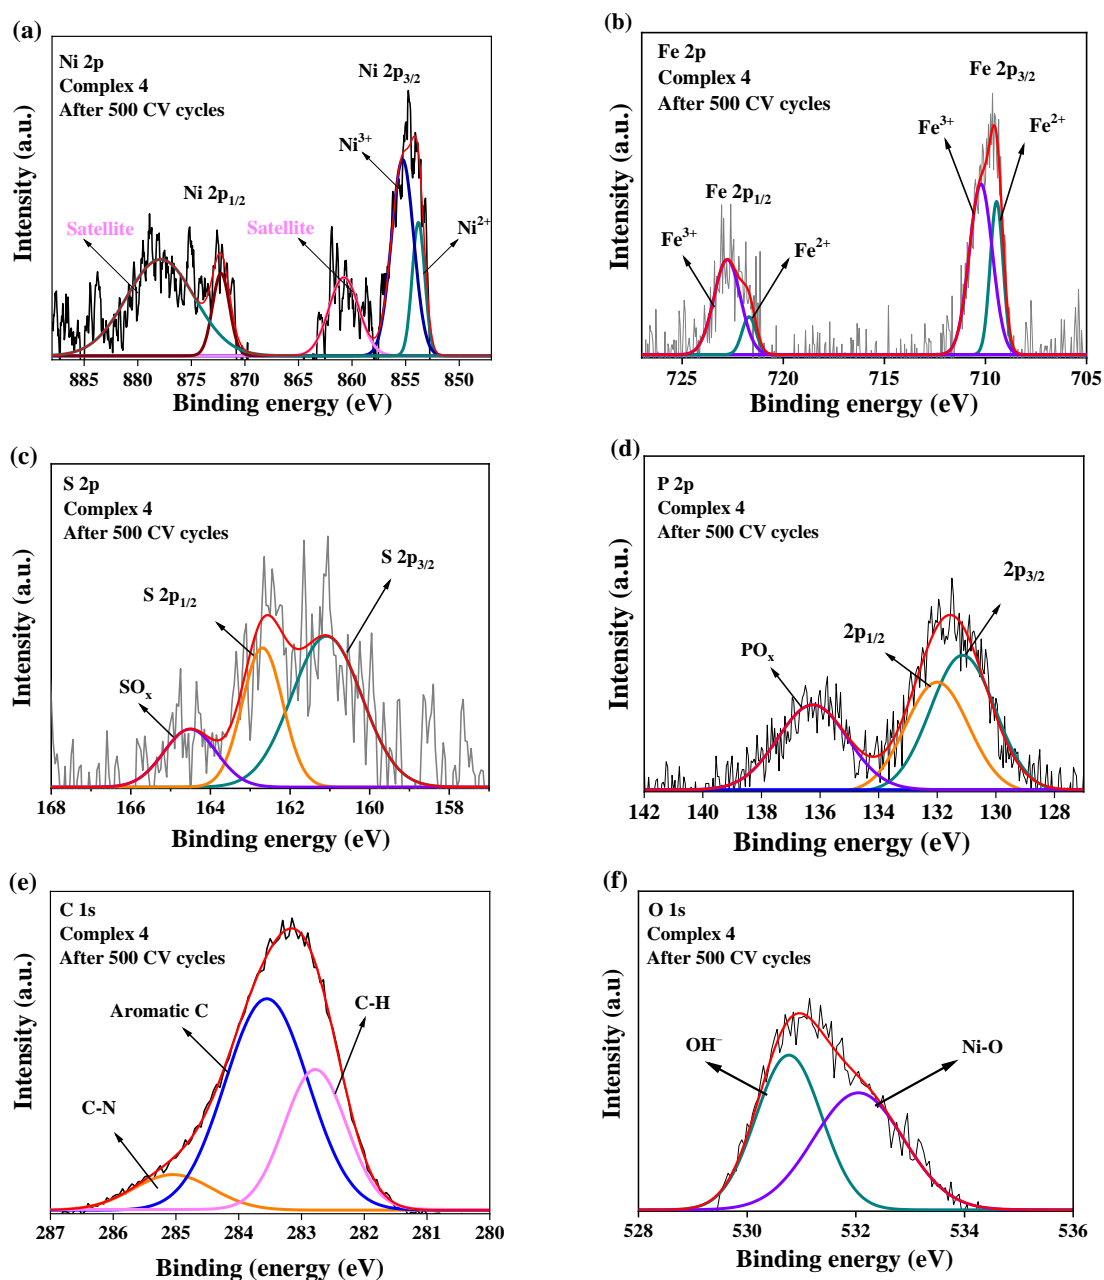

**Fig. S12:** XPS of active catalyst derived from complex 4 after 500 CV cycles (a) Ni 2p XPS showing the peaks at 853.86 eV, and 872 eV assigned for the Ni 2p<sub>3/2</sub> and Ni 2p<sub>1/2</sub>, respectively, the peaks at 853.90 eV and 855.19 eV was attributed to the Ni<sup>2+</sup> and Ni<sup>3+</sup> species; (b) The Fe 2p XPS of complex displays peaks for Fe 2p<sub>3/2</sub> and Fe 2p<sub>1/2</sub>, the peaks centered at 709.31 eV and 721.60 eV are attributed to Fe<sup>2+</sup>, while peaks at 710.42 eV and 723.18 eV correspond to Fe<sup>3+</sup>; (c) S 2p XPS indicating three peaks at 161.21 eV, 162.73 eV, and 163.81 eV attributed to the S 2p<sub>3/2</sub>, S 2p<sub>1/2</sub>, and SO<sub>x</sub> species, respectively; (d) P 2p XPS showing three peaks at 129.71 eV, 130.81 eV and 136.32 eV, assigned for P 2p<sub>3/2</sub>, P 2p<sub>1/2</sub>, and PO<sub>x</sub> species, respectively; (e) C 1s XPS showing three peaks at 285.10 eV, 283.57 eV, and 282.73 eV

corresponding to C-N bond, aromatic C, and C-H bond, respectively; (f) O 1s XPS indicating two peaks at 530.75 eV and 532.07 eV corresponding to OH<sup>-</sup> and Ni-O bond.

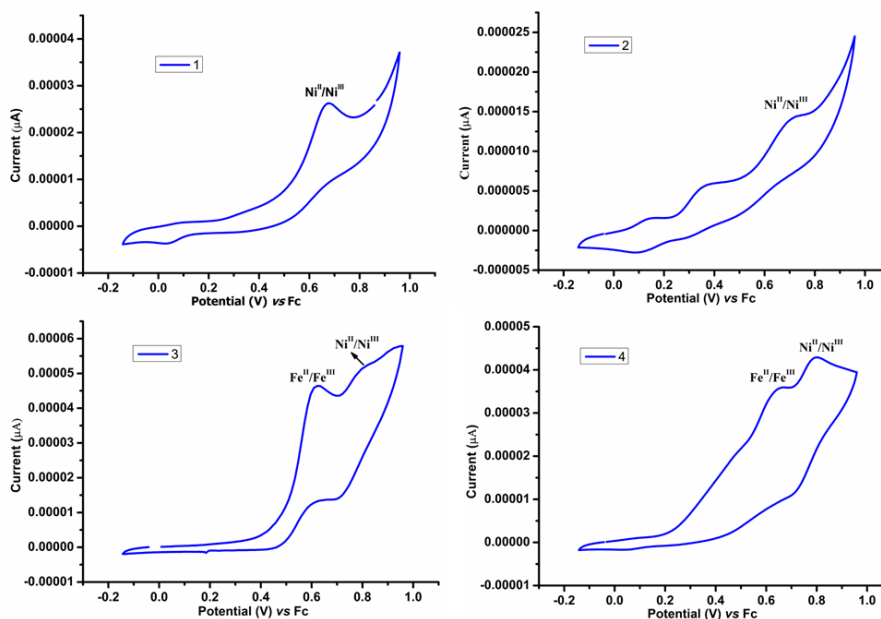

**Fig. S13:** Cyclic voltammograms (CVs) of complexes **1–4** (1 mM) in acetonitrile solution containing 0.1 M TBAPF<sub>6</sub> supporting electrolyte at a scan rate of 100 mV. The glassy carbon electrode (GCE) with a 2 mm diameter served as the working electrode, platinum wire as the counter electrode, and Ag/AgNO<sub>3</sub> as the reference electrode.

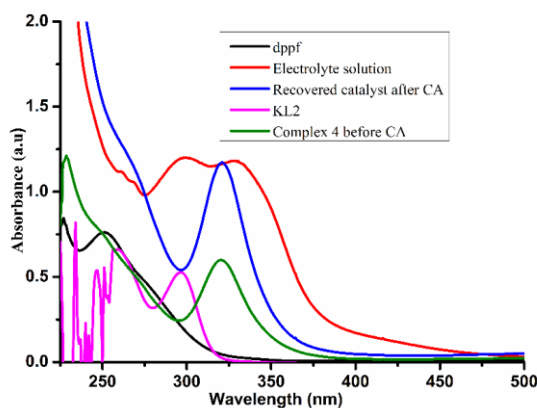

**Fig. S14:** UV-Vis. spectra of dppf, electrolyte solution, KL2 ligand, complex **4** before and after CA.

**Table S1.** A literature survey table compares the OER performance of related Ni(II)-based catalysts

| Catalyst <sup>a</sup>                                                      | Electrolyte      | Overpotential (mV)                                                 | TOF                                     | Reference                                                           |
|----------------------------------------------------------------------------|------------------|--------------------------------------------------------------------|-----------------------------------------|---------------------------------------------------------------------|
| Ni[(TMC)(CH <sub>3</sub> CN)](NO <sub>3</sub> ) <sub>2</sub>               | Phosphate buffer | 590 mV @0.5 mA cm <sup>-2</sup>                                    | -                                       | <i>Chem. Commun.</i> , 2019, <b>55</b> , 6122–6125.                 |
| [NiL](PF <sub>6</sub> ) <sub>2</sub>                                       | Phosphate buffer | 270 mV @0.65 mA cm <sup>-2</sup>                                   | -                                       | <i>Catal. Sci. Technol.</i> , 2019, <b>9</b> , 5651–5659.           |
| Ni–Hmfchce                                                                 | 0.1 KOH          | 490 mV @10 mA cm <sup>-2</sup>                                     | -                                       | <i>Polyhedron</i> , 2019, <b>174</b> , 114160.                      |
| Ni(II)1,1-dithiolate-phosphine                                             | 1.0 M KOH        | 350 mV @10 mA cm <sup>-2</sup>                                     | -                                       | <i>Dalton Trans.</i> , 2020, <b>49</b> , 3592.                      |
| Ni-MOG                                                                     | 0.1 M KOH        | 418 mV @10 mA cm <sup>-2</sup>                                     | -                                       | <i>ChemCatChem</i> , 2023, <b>15</b> , e202300694.                  |
| LaNiO <sub>2.9</sub> F <sub>0.1</sub>                                      | 1.0 M KOH        | 320 mV @10 mA cm <sup>-2</sup>                                     | -                                       | <i>ACS Catal.</i> , 2024, <b>14</b> , 15096–15107.                  |
| N–Co–Mo–GF/CNT on Ni                                                       | 0.1 M KOH        | 330 mV @10 mA cm <sup>-2</sup> ,<br>350 mV @50 mA cm <sup>-2</sup> | -                                       | <i>ACS Catal.</i> , 2020, <b>10</b> , 4647–4658.                    |
| Ni <sub>5</sub> P <sub>4</sub> Films/Ni foil                               | 1.0 M KOH        | 150 mV @10 mA cm <sup>-2</sup>                                     | -                                       | <i>Angew. Chem. Int. Ed.</i> , 2015, <b>54</b> , 12361–12365.       |
| Ni(II) dithiocarbamate                                                     | 1.0 M KOH        | 330 mV @10 mA cm <sup>-2</sup>                                     | 5.2 × 10 <sup>-1</sup> s <sup>-1</sup>  | <i>Dalton Trans.</i> , 2023, <b>52</b> , 936–946.                   |
| α-Ni(OH) <sub>2</sub>                                                      | 0.1 M KOH        | 331 mV @10 mA cm <sup>-2</sup>                                     | 3.61 × 10 <sup>-2</sup> s <sup>-1</sup> | <i>J. Am. Chem. Soc.</i> , 2014, <b>136</b> , 7077–7084             |
| (bpy) <sub>z</sub> NiO <sub>x</sub> H <sub>y</sub> (bpy = 2,2'-bipyridine) | 1.0 M NaOH       | 300 mV @1.0 mA cm <sup>-2</sup>                                    | 1.1 s <sup>-1</sup>                     | <i>ACS Appl. Mater. Interfaces</i> , 2021, <b>13</b> , 48661–48668. |
| [Ni(S^S)(P^P)]PF <sub>6</sub>                                              | 1.0 M KOH        | 250 mV @10 mA cm <sup>-2</sup>                                     | 6.94 × 10 <sup>-2</sup> s <sup>-1</sup> | This work                                                           |
